1 **Evidence for the role of extrusomes in evading attack by the**  
2 **host immune system in a scuticociliate parasite**

3 Iria Folgueira<sup>1</sup>, Jesús Lamas<sup>2</sup>, Ana Paula De Felipe<sup>1</sup>, Rosa Ana Sueiro<sup>1</sup>, José  
4 Manuel Leiro<sup>1,\*</sup>

5 *<sup>1</sup>Departamento de Microbiología y Parasitología, Instituto de Investigación y Análisis*  
6 *Alimentarios, Campus Vida, Universidad de Santiago de Compostela, Spain*

7 *<sup>2</sup>Departamento de Biología Funcional, Instituto de Acuicultura, Campus Vida, Universidad de*  
8 *Santiago de Compostela, Spain*

9

10

11

12

13

14 SHORT TITLE: Defensive role of extrusomes in scuticociliate parasites

15

16

17

18

19

20

21

22

23

24

25

26 \*Author for correspondence:

27 Laboratorio de Parasitología,

28 Instituto de Investigación y Análisis Alimentarios,

29 Universidad de Santiago de Compostela,

30 C/ Constantino Candeira s/n, Campus Vida,

31 15875, Santiago de Compostela, La Coruña, Spain.

32 **Abstract**

33 Like other ciliates, the scuticociliate parasite of turbot, *Philasterides*  
34 *dicentrarchi*, produces only a feeding or growing stage called a trophont during its life  
35 cycle. Exposure of the trophonts to immune serum extracted from the host and  
36 containing specific antibodies that induce agglutination / immobilization leads to the  
37 production of a mucoïd capsule from which the trophonts later emerge. We investigated  
38 how these capsules are generated, observing that the mechanism was associated with  
39 the process of exocytosis involved in the release of a matrix material from the  
40 extrusomes. The extruded material contains mucin-like glycoproteins that are deposited  
41 on the surface of the cell and whose expression increases with time of exposure to the  
42 turbot antibodies, at both protein expression and gene expression levels. Stimulation of  
43 the trophonts with host immune serum also causes an increase in discharge of the  
44 intracellular storage compartments of calcium necessary for the exocytosis processes in  
45 the extrusomes. The results obtained suggest that *P. dicentrarchi* uses the extrusion  
46 mechanism to generate a physical barrier protecting the ciliate from attack by soluble  
47 factors of the host immune system. Data on the proteins involved and the potential  
48 development of molecules that interfere with this exocytic process could contribute to  
49 the development of glycosylated recombinant vaccines and drugs to improve the  
50 prevention and control of scuticociliatosis in turbot.

51

52 **Keywords:** *Philasterides dicentrarchi*, turbot, exocytosis, extrusomes, trichocyst matrix  
53 proteins, mucin-like glycoproteins.

54

55

56

57

58

59

60

61

62

63

## 64 **Introduction**

65 Exocytosis may be an important mechanism of communication between  
66 microbes. Indeed, some microorganisms can develop highly specialized exocytotic  
67 organelles via the extrusion of different materials with important roles in mechanisms  
68 enabling adaptation to different environmental conditions [1]. Several groups of  
69 protozoa possess different types of exocytotic extrusive organelles, known as  
70 extrusomes. These organelles are associated with the cell membrane and have different  
71 structures containing a material that is usually expelled or extruded from the cell and  
72 that participates in different functions [2]. In ciliates, most extrusomes belong to the  
73 trichocyst type, which are characteristically spindle shaped and can quickly download  
74 their protein content in the form of a projectile in response to mechanical or physical  
75 stimuli, and with a probable function in defence against predators [3]. Other common  
76 extrusomes in some groups of ciliates include the toxicysts and haptocysts, which  
77 contain toxic material or can extrude material capable of penetrating the prey; both  
78 have a possible predatory function for prey capture and food uptake [4,5]. The function  
79 of trichites-type extrusomes, rod-shaped organelles circumferentially arranged in  
80 plasma pockets [6], is not yet completely known. However, it is believed that they can  
81 act as defensive or offensive elements [7]. Mucocysts and cortical granules, a special  
82 type of mucocysts, secrete an amorphous mucilaginous protective material on the cell  
83 surface. In some species, this material may be involved in the formation of cysts or  
84 temporary capsules with a protective role and constituting a first line of defence against  
85 predators in the ciliate, regulating cell ionic concentration and anchoring cells to  
86 substrates [3, 8-10].

87 *Philasterides dicentrarchi* is an amphizoic scuticociliate, originally free-living,  
88 which under certain conditions can be transformed into an opportunistic histiophagous  
89 parasite in cultivated flat fish, causing a serious disease called scuticociliatosis and  
90 producing high mortality rates [11,12]. In order to produce the parasitic phase, the  
91 ciliate must develop various strategies of biochemical adaptation to its new habitat  
92 [13,14]. In addition, it must evade attack by the fish immune system, especially by lysis  
93 induced by soluble factors in the serum, such as complement. Activation of complement  
94 via the classical route (in conjunction with antibodies), together with activation of the  
95 coagulation system, causes destruction of the parasite [15-17]. Two types of extrusomes

96 have been characterized in *P. dicentrarchi*: one fusiform, compatible with trichocysts,  
97 and the other spherical, compatible with mucocysts, and which release a thin layer of  
98 mucus on the cell surface [18,19]. In previous studies, we have observed that incubation  
99 (for 2h) of *P. dicentrarchi* trophonts with serum from turbot that had survived a natural  
100 outbreak of scuticociliatosis caused agglutination and immobilization of the ciliates and  
101 the appearance of numerous capsules from which the trophonts later emerged. We  
102 interpreted this phenomenon as a possible antigenic change and a mechanism of  
103 evasion of the humoral immune response [20].

104 In the present study, we aimed i) to elucidate the role of the extrusomes in  
105 capsule production induced by incubation of the trophonts of *P. dicentrarchi* with  
106 immune sera from vaccinated turbot that produce agglutinating and immobilizing  
107 antibodies, ii) to characterize the proteins of the trichocysts and mucocysts after  
108 extrusion, and iii) to demonstrate the role of the process of exocytosis as a ciliate  
109 defence mechanism against attack by the soluble factors of the host humoral immune  
110 system.

111

## 112 **Materials and Methods**

113

### 114 **Parasites**

115 Specimens of *P. dicentrarchi* (isolate I1) were collected under aseptic conditions  
116 from peritoneal fluid obtained from experimentally infected turbot (*Scophthalmus*  
117 *maximus*), as previously described [21]. The ciliates were cultured at 21 °C in complete  
118 sterile L-15 medium, as previously described [20]. In order to maintain the virulence of  
119 the ciliates, fish were experimentally infected every 6 months by intraperitoneal (ip)  
120 injection of 200 µL of sterile physiological saline containing  $5 \times 10^5$  trophonts, and the  
121 ciliates were recovered from ascitic fluid and maintained in culture as described above.

122

### 123 **Experimental animals**

124 Turbot of approximately 50 g body weight were obtained from a local fish farm.  
125 The fish were held in 250-L tanks with aerated recirculating sea water maintained at 14  
126 °C. They were subjected to a photoperiod of 12L:12D and fed daily with commercial

127 pellets (Skretting, Burgos, Spain). The fish were acclimatized to laboratory conditions for  
128 2 weeks before the start of the experiments.

129 Swiss ICR (CD-1) mice (eight to ten weeks old), supplied by Charles River  
130 Laboratories (USA), were bred and maintained in the Central Animal Facility of the  
131 University of Santiago de Compostela (Spain). The mice were reared following the  
132 criteria for the protection, control, care and welfare of animals and the legislative  
133 requirements relating to the use of animals for experimentation (EU Directive  
134 86/609/EEC), the Declaration of Helsinki, and/or the Guide for the Care and Use of  
135 Laboratory Animals as adopted and promulgated by the US National Institutes of Health  
136 (NIH Publication No. 85–23, revised 1996). The Institutional Animal Care and Use  
137 Committee of the University of Santiago de Compostela approved all experimental  
138 protocols.

139

## 140 Microscopic analysis

141

### 142 *Scanning electron microscopy (SEM)*

143 Ciliates treated with turbot immune serum (see Immunization and serum collection),  
144 were collected by centrifugation at 1000 x g, were fixed with 2.5% (v/w) glutaraldehyde  
145 in a cold solution of 4% paraformaldehyde in 0.1 M potassium phosphate buffer (PB),  
146 pH 7.2 for 30 min. The samples were post-fixed for 30 minutes with 1% (wt/v) osmium  
147 tetroxide in PB. The samples were then washed three times with distilled water and  
148 dehydrated in a series of ethanol (50, 70, 90, 95, 100, 100% for 10 min each) and  
149 hexamethyldisilazane (HMDS, Sigma-Aldrich) (50 and 100% for 10 min each). Finally, the  
150 samples were mounted on aluminium stubs, sputter coated with a layer of iridium, by  
151 using a Q150T-S sputter coater (Quorum Technologies, UK), and viewed under a Zeiss  
152 Fesem ultra plus microscope (Zeiss, Germany) at 10 kV.

153

### 154 *Transmission electron microscopy (TEM)*

155 For TEM, we followed the technique described by [19]. Briefly, the cultured  
156 ciliates were collected by centrifugation at 1000 x g for 5 min. Cells were fixed in 2.5%  
157 (v/v) glutaraldehyde in 0.1 M cacodylate buffer at pH 7.2. They were then washed  
158 several times with 0.1 M cacodylate buffer and post-fixed in 1% (wt/v) OsO<sub>4</sub>, pre-stained

159 in saturated aqueous uranyl acetate, dehydrated through a graded acetone series and  
160 embedded in Spurr's resin. Semi-thin sections were then cut with an ultratome (Leica  
161 Ultracut UCT, Leica microsystems, Germany) and stained with 1% toluidine blue for  
162 examination under a light microscope. Ultrathin sections were stained in alcoholic  
163 uranyl acetate and lead citrate and viewed in a Jeol JEM-1011 transmission electron  
164 microscope (Jeol, Japan) at an accelerating voltage of 100 kV.

165

#### 166 *Histochemistry: Safranin-O Staining*

167

168 For detection of mucin-type proteins, the cells were stained with Safranin-O.  
169 Ciliates were incubated without turbot immune serum or with the serum for different  
170 times. The ciliates were fixed in 10% buffered formalin (PBS; 0.01 M Na<sub>2</sub>HPO<sub>4</sub>, 0.0018 M  
171 KH<sub>2</sub>PO<sub>4</sub>, 0.0027 M KCl, 0.137 M NaCl, pH 7.0). The samples were then washed 2 times  
172 with distilled water and incubated for 5 min with an aqueous solution of 0.1% of  
173 Safranin-O. After exhaustive washing with water to eliminate excess dye, the  
174 preparation was air-dried and mounted using a permanent mounting medium  
175 (Entellan<sup>®</sup>, Merck).

176

#### 177 Trichocyst associated proteins

178 The sequences of several mRNAs that encode proteins potentially related to the  
179 trichocysts of *Philasterides dicentrarchi* were obtained from a previous RNAseq study  
180 carried out to compare the transcriptome of several *P. dicentrarchi* strains, in  
181 collaboration with ZF-Screen (Holland). The assembled sequences were analyzed using  
182 Blastgo software 5.0 (Biobam, Spain), to identify homologous sequences, before  
183 functional annotation. Annotated sequences that encode proteins potentially related to  
184 the trichocysts of ciliates were selected using the BLASTx tool of the TGD Wiki  
185 ([http://www.ciliate.org/blast/blast\\_link.cgi](http://www.ciliate.org/blast/blast_link.cgi)) where the *Tetrahymena thermophila* gene  
186 and protein sequences database is located. To confirm the nucleotide sequences that  
187 encode the proteins associated with the extrusomes obtained by RNAseq, their cDNAs  
188 were amplified by RT-PCR and sequenced by Sanger Sequencing (Eurofins Genomics,  
189 Germany). The selected proteins associated with the extrusomes were the *P.*

190 *dicentrarchi* trichocyst matrix protein T2A (TMPT2A) (GenBank accession number  
191 MH412657.1) and the *P. dicentrarchi* trichocyst matrix protein T4-B (TMPT4B) (GenBank  
192 accession number MH412658.1).

193

## 194 Production of recombinant proteins in yeast cells

195 The complete nucleotide sequence that encoded TMPT2A was modified and  
196 optimized to produce the recombinant protein in the yeast *Kluyveromyces lactis*, by  
197 using the bioinformatics tool developed by Integrated DNA Technology (IDT)  
198 (<https://eu.idtdna.com/CodonOpt>). The gene was then synthesized by Invitro GeneArt  
199 Gene Synthesis (ThermoFisher Scientific). For expression of recombinant protein in  
200 yeast, the *K. Lactis* Protein Expression kit (New England Biolabs, UK) was used with the  
201 pKLAC2 vector, following the instructions provided by the manufacturer. Initially, the  
202 synthesized nucleotide sequence was cloned in the pSpark® II vector (Canvax, Spain),  
203 and the recombinant plasmid was subsequently amplified in competent *Escherichia coli*  
204 strain DH-5 $\alpha$ . After extraction and purification of the plasmid from the bacteria, PCR was  
205 carried out using the following primers: FT2AKI 5'  
206 CGCCTCGAGAAAAGAatgcgtgtctgaccgcaacta-3' / RT2AKI 5-'  
207 ATAAGAATGCGGCCGCTTAATGATGATGGTGATGGTGATGATGGTGATGatcggcagcctttacgctc  
208 ga-3'. The reverse primer includes 10 codons encoding histidine at the C-terminal end  
209 of the protein. The yeasts were then transformed with the cloned pKLAC2 plasmid and  
210 seeded in YCB agar medium plates containing 5 mM acetamide at 30°C for 3–4 days until  
211 colony formation. Several of the colonies were collected and inoculated in the YPGal  
212 medium at 30 °C for 3-4 days with shaking at 250 rpm. When a suitable cell density was  
213 reached, the medium was centrifuged at 6000 xg for 10 min, and the supernatant was  
214 held at 4 °C until use. The protein was purified by submitting the supernatant to  
215 immobilized metal affinity chromatography (IMAC) using prepacked columns with Ni-  
216 Sepharose (HisTrap™, GE Healthcare) in an ÄKTA Star protein purification system (GE  
217 Healthcare) following the manufacturer's instructions. Once eluted, the protein was  
218 fully dialysed against distilled water using dialysis tubing of pore size 3 kDa. Finally, the  
219 protein was lyophilized and stored at 4 °C until use.

220

221

222

## 223 Sodium dodecyl sulphate polyacrylamide gel electrophoresis (SDS-PAGE)

224 SDS-PAGE analysis of the recombinant TMPT2A (rTMPT2A) was performed on  
225 linear 12.5% polyacrylamide minigels in a Mini-Protean® Tetra cell system (BioRad, USA),  
226 as described by [22]. The gels consisted of 4% stacking gel and a 12.5% linear separating  
227 gel. Samples were dissolved in 62 mM Tris-HCl buffer (pH 6.8) containing 2% SDS, 10%  
228 glycerol and 0.004% bromophenol blue and heated for 5 min in a boiling water bath.  
229 The gels were electrophoresed at a constant 200 V in Tris-glycine electrode buffer (25  
230 mM Tris, 190 mM glycine; pH 8.3). The gels were then fixed in 12% trichloroacetic acid  
231 for 1h and stained with QC Colloidal Coomassie stain (BioRad). Molecular weights were  
232 estimated using a calibration curve ( $\text{Log}_{10}$  MW vs Rf) constructed with a prestained  
233 protein standard (NZY Colour Protein Marker II, Nzytech, Portugal).

234

## 235 Immunization and serum collection

236

237 Turbot were immunized by intraperitoneal injection (i.p.) on days 0 and 30 with  
238 200  $\mu\text{l}$  of an emulsion containing  $10^6$  ciliates/mL inactivated with 0.2% formalin and 50%  
239 adjuvant Montanide ISA 763A (Seppic, France) [23]. Blood samples, obtained by caudal  
240 vein puncture, were allowed to clot for 2 h at room temperature before being  
241 centrifuged at 2000  $xg$ . The serum was collected and stored at  $-20^\circ\text{C}$  until use.

242 A group of five ICR (Swiss) CD-1 mice were immunized by i.p. injection with 200  
243  $\mu\text{L}$  per mouse of a 1:1 (v/v) mixture of Freund's complete adjuvant (Sigma-Aldrich) and  
244 a solution containing 250  $\mu\text{g}$  of purified rTMPT2A. The same dose of purified protein was  
245 prepared in Freund's incomplete adjuvant and injected i.p. in mice 15 and 30 days after  
246 the first immunization. The mice were bled via retrobulbar venous plexus 15 days after  
247 the last immunization (Day 30) for initial checking of the antibody levels. If the antibody  
248 levels were satisfactory, the mice were decapitated and immediately bled. The blood  
249 was allowed to coagulate overnight at  $4^\circ\text{C}$ , and the serum was then separated by  
250 centrifugation (2000  $xg$  for 10 min), mixed 1:1 with glycerol and stored at  $-20^\circ\text{C}$  until  
251 use.

252



253 Immunological assays

254

255 *Immobilization/agglutination assay*

256 Cultured ciliates were washed 3 times in incomplete L-15 medium. Aliquots of 200  
257 ciliates were added to individual wells of 96 well microplates (Corning, USA), in a final  
258 volume of 50  $\mu$ L in L5-medium. Before the assay, the serum was heat-inactivated at 56  
259  $^{\circ}$ C for 30 min. The immune serum was assayed in triplicate and added to the wells  
260 containing the ciliates at dilutions of 1/25, 1/50 and 1/100 in L-15 medium. The plates  
261 were incubated at room temperature and checked for immobilization/agglutination  
262 responses, after 15, 30 and 60 min, under an inverted microscope (Nikon Eclipse TE300  
263 Nikon, Japan). All assays included a ciliate control in incomplete L-15 medium with no  
264 serum. The agglutination response was expressed as the percentage of agglutinated  
265 ciliates.

266

267 *Immunofluorescence and confocal microscopy*

268 For immunolocalization of mucin-like proteins, an immunofluorescence assay was  
269 performed as previously described [24]. Briefly,  $5 \times 10^6$  ciliates incubated for different  
270 times with the immune serum from turbot, were centrifuged at 1000 xg for 5 min,  
271 washed twice with PBS pH 7.0 and fixed for 15 min in a solution of 4% formaldehyde in  
272 PBS at room temperature. The ciliates were then washed twice with PBS, resuspended  
273 in a solution containing 0.3% Triton X-100 in PBS for 3 min, washed twice with PBS, and  
274 incubated with 1% BSA for 30 min. After this blocking step, the ciliates were washed in  
275 PBS and incubated at room temperature with agitation (750 rpm) for an hour with a  
276 1:100 dilution in PBS of mice serum anti-rTMPT2A. After being washed 3 times with PBS,  
277 the ciliate samples were added to a 1:1000 dilution of fluorescein isothiocyanate (FITC)  
278 conjugated rabbit/ anti-mouse Ig (DAKO, Denmark) and incubated for 1h at room  
279 temperature, in darkness. After another three washes in PBS, the samples were  
280 mounted in PBS-glycerol (1:1) and visualized by confocal microscopy (Leica TCS-SP2,  
281 Leica Microsystems, Germany).

282

283

284

285 *Fluorescent enzyme-linked immunosorbent assay (FELISA)*

286 For quantification of the expression of the TMPT2A by the trophonts incubated  
287 with turbot immune serum for 30 min and 6h, a FELISA was conducted as previously  
288 described [14]. Ciliate lysate (CL), prepared as previously described [20], was used as  
289 antigen in the assay. One  $\mu\text{g}$  of CL isolated from trophonts dissolved in 100  $\mu\text{L}$  of  
290 carbonate-bicarbonate buffer pH 9.6, was added to wells of ELISA microplates (high  
291 binding, Greiner Bio-One, Germany) and incubated overnight at 4°C. The wells were  
292 then washed three times with 50 mM Tris, 0.15 M NaCl, pH 7.4 buffer (TBS), blocked for  
293 1 h with TBS containing 0.2% Tween 20, 5% non-fat dry milk, incubated for 30 min at  
294 37°C in a microplate shaker at 750 rpm with 1:100 dilution of anti-rTMPT2A in TBS, and  
295 washed five times with TBS containing 0.05% Tween 20. Bound anti-mouse antibodies  
296 were detected with FITC-conjugated rabbit anti-mouse (Dako, Denmark) diluted 1:500  
297 in TBS, after incubation for 30 min with shaking. After five washes in TBS, 100  $\mu\text{L}$  of TBS  
298 was added to each well, and the fluorescence was measured in a microplate  
299 fluorescence reader (Bio-Tek Instruments, USA), at an excitation wavelength of 490 nm,  
300 and emission wavelength of 525 nm (sensitivity, 70%). The results are expressed in  
301 arbitrary fluorescence units.

302

303

304 **Reverse transcriptase-quantitative polymerase chain reaction (RT-qPCR)**

305 Aliquots of  $10^6$  trophonts/mL of *P. dicentrarchi* were incubated for 10, 60 and  
306 240 min with turbot immune serum diluted 1:50 in incomplete L-15 medium. In some  
307 experiments, ciliates were incubated for 240 min with 500  $\mu\text{M}$  of dibucaine  
308 hydrochloride (Sigma-Aldrich). Total RNA was isolated from the trophonts by using the  
309 NucleoSpin RNA isolation kit (Macherey-Nagel) according to the manufacturer's  
310 instructions. After purification of the RNA, the quality, purity and concentration were  
311 measured in a NanoDrop ND-1000 Spectrophotometer (NanoDrop Technologies, USA).  
312 The reaction mixture (25  $\mu\text{L}$ ) used for cDNA synthesis contained 1.25  $\mu\text{M}$  random  
313 hexamer primers (Promega), 250  $\mu\text{M}$  of each deoxynucleoside triphosphate (dNTP), 10  
314 mM dithiothreitol (DTT), 20 U of RNase inhibitor, 2.5 mM  $\text{MgCl}_2$ , 200 U of Moloney  
315 murine leukemia virus reverse transcriptase (MMLV; Promega) in 30 mM Tris and 20  
316 mM KCl (pH 8.3) and 2  $\mu\text{g}$  of sample RNA. PCR (for cDNA amplification) was performed

317 with gene-specific primers forward/reverse pair for the TMPT2A gene  
318 (FTMPT2/RTMPT2) 5'- ATTTGCTTGC GTTCTCGTCT-3' / 5'- TCATCTTCGTCTTGGGCTCT-3';  
319 TMPT4B gene (FTMPT4/ RTMPT4) 5'- CCACGAGAGATGGGTAGAGG-3' / 5'-  
320 AATTCAATCTGGTGGCCAAT-3'. In parallel, a qPCR was performed with *P. dicentrarchi*  
321 elongation factor 1-alpha gene (EF-1 $\alpha$ ) (GenBank accession KF952262) as a reference  
322 gene, by including the forward/reverse primer pair (FEF1A/REF1A) 5'-  
323 TCGCTCCTTCTTGCATCGTT-3'/ 5'- TCTGGCTGGGTCGTTTTTGT-3'). The Primer 3Plus  
324 program was used, with default parameters, to design and optimize the primer sets.  
325 Quantitative PCR mixtures (10  $\mu$ L) contained 5  $\mu$ L Kapa SYBR FAST qPCR Master Mix (2X)  
326 (Sigma-Aldrich), 300 nM of the primer pair, 1  $\mu$ L of cDNA and RNase-DNase-free water.  
327 Quantitative PCR was developed at 95 °C for 5 min, followed by 40 cycles at 95 °C for 10  
328 s and 60 °C for 30 s, ending with melting-curve analysis at 95 °C for 15 s, 55 °C for 15 s  
329 and 95 °C for 15 s. qPCRs were performed in an Eco RT-PCR system (Illumina). Relative  
330 quantification of gene expression was determined by the  $2^{-\Delta\Delta Ct}$  method [25] applied  
331 with software conforming to minimum information for publication of RT-qPCR  
332 experiments (MIQE) guidelines [26].

333

### 334 Intracellular Ca<sup>2+</sup> release analysis

335 The release of intracellular Ca<sup>2+</sup> after stimulation of ciliates with turbot immune  
336 serum was analyzed using the No-Wash, Fluo-4NW calcium assay kit (Life Technologies).  
337 The ciliates (2x10<sup>5</sup>) were washed twice by centrifugation with Hanks' balanced salt  
338 solution (HBSS without Ca<sup>2+</sup>, Mg<sup>2+</sup>, and phenol red) and resuspended in assay medium  
339 (HBSS, 20 mM HEPES and 2.5 mM probenecid) to a final concentration of 1.25x10<sup>6</sup>  
340 ciliates/mL. The ciliates were then incubated with 1:50 dilution of turbot immune serum  
341 in 96-well microplates at 21°C. The cell-permeable Ca<sup>2+</sup> indicator probe, Fluo-4 NW, was  
342 added following the manufacturer's instructions, and the fluorescence (Ex: 494 nm, Em:  
343 516 nm) was measured in a fluorimeter (FLx800, BioTek, USA). Negative controls with  
344 HBSS were included.

345

### 346 Bioinformatic and statistical analysis

347 The performance of the functional analysis of proteins was evaluated and  
348 families predicting the domains and important sites were classified using InterPro

349 software [27]. The transmembrane topology and location of signal peptide cleavage  
350 sites in amino acid sequences were predicted using Phobius [28], SignalP [29] and Signal-  
351 3L 2.0 [30] software. Protein sequence motifs were searched for using the MotiFinder  
352 tool of the Japanese network GenomeNet (accessible on-line at:  
353 <https://www.genome.jp/tools/motif/MOTIF.html>). Mucin type GalNAc O-glycosylation  
354 sites were predicted using the NetOGlyc 4.0 Server [31]. The physicochemical  
355 parameters for a given protein were predicted using the ProtParam tool [32]. Protein  
356 modelling was conducted using the SWISS-MODEL server [33]. The cysteine and  
357 histidine metal binding sites of the sequenced protein were predicted using  
358 METALDETECTOR v2.0 [34]. The amino acid sequences of the TMPT2A and TMPT4B  
359 genes were aligned using Clustal Omega [35]. The evolutionary history was inferred  
360 using the Maximum Likelihood method based on the JTT matrix-based model [36].  
361 Finally, evolutionary analyses were conducted in Mega7 [37].

362 The results are expressed as means  $\pm$  standard error of the means (SEM). The  
363 data were examined by one-way analysis of variance (ANOVA) followed by the Tukey-  
364 Kramer test for multiple comparisons, and differences were considered significant at  
365  $\alpha=0.05$ .

366

## 367 RESULTS

368

### 369 Morphological changes produced in ciliates incubated with immune serum 370 from the host

371 Immunization of turbot with a crude extract of ciliates-CL- generated sufficient  
372 levels of antibodies to induce immobilization/agglutination, with peak levels reached  
373 after one hour of incubation (Fig. 1). As already indicated, we used inactivated immune  
374 sera to prevent the lytic action of complement and to enable specific study of the  
375 processes produced exclusively by the action of the antibodies during agglutination/  
376 immobilization of the trophonts.

377 The presence of agglutinating antibodies caused the agglutinated trophonts to  
378 produce a mucoid capsule, which became increasingly evident throughout the  
379 incubation period. After two hours of incubation, the ciliates began to emerge from the  
380 capsules, showing a normal morphology, and the number of free ciliates increased over

381 time. The empty capsules showed the external morphology of the parasite. (Fig. 2). SEM-  
382 examination of the agglutination process clearly revealed the superficial changes that  
383 take place in the ciliate in the presence of the turbot immune serum over time (Fig. 3).  
384 The addition of the immune serum initially did not seem to affect the ciliates, whose  
385 ciliary morphology was apparently unchanged (time 0); however, during the incubation  
386 period the trophonts increased in diameter and a layer of gradually thicker amorphous  
387 material appeared on the surface. At the end of the process, microphotographs clearly  
388 show the presence of structures that maintain the external ciliary morphology but that  
389 are hollow. The free ciliates showed a normal ciliary structure (Fig. 3).

390

### 391 Molecular and biochemical characterization of the extrusome proteins

392 *P. dicentrarchi* has two types of extrusomes associated with the plasma  
393 membrane and located at the insertion sites between the alveolar sacs (Fig 4).  
394 Examination by electron microscopy revealed that the extrusomes have spherical  
395 morphology (Fig. 4A) or elongated morphology (Fig. 4B). Apart from the morphology,  
396 the characteristics of the material that these two types of extrusomes contain were also  
397 different. Thus, on the one hand, rounded extrusomes contained an electrolucent  
398 material (Fig. 4A), while elongated extrusomes contained greater amounts of  
399 electrodense material (Fig. 4B).

400 In order to identify possible proteins contained in the extrusomes, we used RNA  
401 sequencing technology. This enabled us to sequence the entire transcriptome of the  
402 ciliates and to locate the protein sequences that may be related to the extrusomes. After  
403 annotation of the genes that encode proteins of the parasite, using the BLASTx tool, we  
404 were able to detect proteins associated with extrusomes in other ciliates. Thus,  
405 homology analysis enabled us to detect two types of proteins related to extrusomes: 1)  
406 *P. dicentrarchi* trichocyst matrix protein T2-A (TMPT2A) (accession MH412657.1)  
407 encoded by an 1134 bp mRNA that generates a protein of 377 aa (Fig. 4C), of molecular  
408 weight 43502.79 daltons and a theoretical pI of 4.96 (Fig. 4E). This protein has a signal  
409 peptide between position 1 and 18 (Fig. 4C), with a cleavage site between position 18  
410 and 19, corresponding to aa 15-18 with the signal peptide C-region, between aa 3-14  
411 the signal peptide H-region is located and between the aa 1-2 the signal peptide N-  
412 region. The TMPT2A protein possesses 12 potential O-glycosylation sites in the aa 182,

413 189, 195-196, 202, 210, 222-224, 317, 348 y 366 (Fig. 4C), and binds to metals in the  
414 cysteine at position 10. 2) *P. dicentrarchi* trichocyst matrix protein T4-B (TMPT4B)  
415 (accession MH412658.1) encoded by an 1113 bp mRNA and possesses 370 aa (Fig. 4D)  
416 of molecular weight of 41996.11 daltons and a theoretical pI of 4.90 (Fig. 4F). The modeling  
417 of the structure of the proteins, using the Swiss-model, indicates that the oligomeric  
418 state of the two *P. dicentrarchi* trichocyst matrix proteins is monomeric. The protein has  
419 a signal peptide located between aa 1-16, according to the prediction by the Phobius  
420 program (Fig. 4D); however, the Signal-3L program predicts a signal peptide between aa  
421 1 and 23. According to Phobius, the signal peptide C-region is located between aa 13  
422 and 16, the signal peptide H-region between aa 4-12, and the signal peptide N-region  
423 between aa 1 and 3. This protein has 12 potential O-glycosylation sites in aas 21, 28, 54,  
424 104, 111, 147, 218, 286, 291-292, 301 and 324 (Fig. 4D). BLAST analysis of the database  
425 including the *Tetrahymena thermophila* genome (TGD) indicated that this protein is  
426 related to a similar protein encoded by the GRL3 gene (Granule Lattice), which encodes  
427 the granule lattice protein and corresponds to an acidic, calcium-binding structural  
428 protein of dense core granules, contains coiled-coil region. This protein seems to  
429 possess a cysteine at position 16 (which may be a Ca<sup>2+</sup>binding site), according to the  
430 prediction with METALDETECTOR v2.0 (cysteine and histidine metal binding sites  
431 predictor).

432 The TMPT2A and TMPT4B proteins displayed very low sequence identity (23%).  
433 The sequence identity was also very low in comparison with other ciliated proteins (e.g.  
434 *Paramecium*, *Ichthyophthirius* and *Tetrahymena*) with maximum sequence identity  
435 scarcely exceeding 30%, for TMPT2A and TMPT4B (Figs. 5A, B; 6A, B). Phylogenetically,  
436 the TMPT2A protein is closer to *Paramecium* (Fig. 5C), while the TMPT4B protein is more  
437 phylogenetically spaced with the other ciliates analyzed (Fig. 6C).

438 When the ciliates incubated with turbot immune serum were stained with  
439 safranin-O dye, a progressive and time-dependent increase in the intensity of staining  
440 both in the cytoplasm and in the external material surrounding the ciliate was observed  
441 (Fig. 7).

442

443 Expression and location of extrusome proteins after stimulation with  
444 immune serum from the host

445 In order to determine whether the proteins presumably associated with the  
446 trichocysts are involved in the formation of the capsules observed during the  
447 agglutination of the ciliates by the host immune serum, the recombinant protein was  
448 generated in the yeast *Kluyveromyces lactis*. For this purpose, we expressed the TMPT2A  
449 protein in the yeast (Fig. 8A), which was used to generate antisera in mice to enable us  
450 to perform experiments to study expression of this protein after incubation with the  
451 antiserum (Fig. 8B) and to determine the cytolocation (Fig. 8C).

452 First, the recombinant protein expressed by yeast has the biochemical  
453 characteristics (e.g. molecular size) predicted for the original sequence obtained from  
454 the ciliate, which indicates that this protein expression system is optimal for the  
455 heterologous expression of this type of eukaryotic proteins (Fig. 8A). On the other hand,  
456 the antibodies generated in mice against the rTMPT2A protein demonstrated that the  
457 material produced after incubation of ciliates with the turbot immune serum is related  
458 to this protein, as demonstrated by the FELISA assay, in which the absorbance levels of  
459 these antibodies increase during the period of incubation with the immune serum from  
460 turbot (Fig. 8B). By using immunofluorescence, an increase in fluorescence was  
461 observed in both the cytoplasm of the agglutinated ciliates and in the material  
462 associated with the outer surface throughout the incubation period (Fig. 8C).

463

464 *Expression of the genes associated with extrusome proteins and their association*  
465 *with the discharge of intracellular Ca<sup>2+</sup> after stimulation of the ciliates with host immune*  
466 *serum*

467 We investigated expression of the genes encoding the trichocysts proteins  
468 TMPT2A, TMPT4B after incubation with the turbot immune serum for different times.  
469 Incubation of the ciliates with the turbot immune serum produced a significant increase  
470 in the mRNA levels of the genes encoding these proteins throughout the incubation  
471 period (Fig. 9A). Dibucaine, included as a positive control for the induction of extrusion,  
472 also had a stimulatory effect on the expression of both mRNA levels relative to the all

473 trichocyst genes; however, the absolute mean values of increase were higher for the  
474 TMPT2A gene than for the TMPT4B gene (Fig. 9A).

475 Finally, we analyzed the effect of the addition of turbot immune serum on the  
476 intracellular Ca<sup>2+</sup> discharge by using the Fluo-4NW probe. Incubation of the trophonts  
477 with the turbot immune serum induced discharge of intracellular Ca<sup>2+</sup> discharge, as  
478 evidenced by the increase in fluorescence levels throughout the incubation time, while  
479 the fluorescence increased only slightly over time in the ciliates not exposed to the  
480 serum (Fig. 9B).

481

## 482 Discussion

483 In protists, extrusomes are specialized exocytotic and ejectable organelles which  
484 can discharge their contents outside of the cell in response to external mechanical or  
485 chemical stimuli and which can have offensive or defensive functions during predation  
486 or in the acquisition of food [38]. In *P. dicentrarchi*, two types of extrusomes have been  
487 described: a fusiform type (fibrous trichocysts) located in the cortex, perpendicular to  
488 the plasma membrane, and a spherical type (mucocysts) with an irregular distribution  
489 [18,19]. The mucocysts, which have an amorphous content, merge with the plasma  
490 membrane and release their contents to the exterior giving rise to a thin mucilaginous  
491 layer over the cell surface [19]. Although in free-living ciliates the extrusomes can have  
492 a protective or defensive response to environmental changes, in ciliated parasites such  
493 as *P. dicentrarchi*, the extrusomes may play a role in providing protection from attack by  
494 the host immune system. The existence of the production of capsules by the trophonts  
495 of *P. dicentrarchi* was initially obtained in studies of ciliate agglutination caused by  
496 different immune sera from turbot and rabbit [20]. In those studies, it was observed that  
497 when ciliates were incubated with the immune sera (for 2h), abundant transparent  
498 capsule-like structures appeared. The precise surface topography of the ciliate, including  
499 the somatic cilia could be seen and ciliates were also observed moving within the  
500 capsules [20]. At that time, it was interpreted that their capsules probably made up of  
501 immunocomplexes between these antigens and the agglutinating antibodies [20]. In the  
502 present study, we sequentially monitored the agglutination of the trophonts by  
503 inactivated immune turbot serum in order to investigate the capsule formation. The  
504 phenomenon of capsule formation has already been described in the ciliates; e.g.



505 *Tetrahymena* forms capsules when exocytosis of mature mucocysts is induced by the  
506 secretagogue Alcian Blue 8GS [39-41]. In the environment, the ciliate mucocysts secrete  
507 an amorphous material to protect the cell from osmotic shock or from predator attacks  
508 [43].

509 The appearance of capsules during agglutination of the *P. dicentrarchi* trophonts  
510 with immune serum suggests that the host antibodies induce the mucocysts to extrude  
511 their mucilaginous content. This material is deposited on the surface of the ciliate  
512 forming a protective layer, which eventually became a rigid capsule with an external  
513 topology identical to that of the ciliate and which protects it from agglutination. This  
514 process was clearly observed in this study by both optical microscopy and SEM.

515 In ciliates such as *Paramecium*, trichocysts are characterized by a highly  
516 constrained shape that reflects the crystalline organization of the proteins that they  
517 contain and that are derived from the process of a broad family of precursor proteins  
518 (coded by a family of some 100 coexpressed genes) that allow correct processing of the  
519 crystalline core assembly necessary for functioning of the trichocyst [44,45]. The  
520 trichocyst matrix proteins in *Paramecium* are of sizes ranging between 15-20 kDa, and  
521 some are glycosylated; the isoelectric points are between 4.7 and 5.5 and the proteins  
522 seem to be derived from the proteolytic processing of precursor proteins of size  
523 between 40-45 kDa [46,47]. In our study, the TMPT2A and TMPT4B proteins were about  
524 43 kDa in size and the isoelectric points were close to 5.0, i.e. they are compatible with  
525 the precursor proteins described in *Paramecium*. In addition, the proteins from *P.*  
526 *dicentrarchi* possess sequences with a very low similarity to each other, although with  
527 very similar isoelectric points and sizes. This may indicate that the trichocyst matrix is  
528 composed of complex interrelated proteins, or of the proteolytic processing during the  
529 maturation of secretory proteins [46], or of post-translational modifications [48]. It has  
530 also been observed in *Paramecium tetraurelia* that proteins released by exocytosis of  
531 trichocysts are glycoproteins [49].

532 As previously mentioned, apart from the encysting stages of the ciliates, capsule  
533 production is rare, but has been induced *in vitro* in several species [42]. The capsule has  
534 been shown to consist of mucopolysaccharide material from mucocysts [50,51].  
535 *Tetrahymena* has mucocyst-type extrusomes characterized by containing mucin-like  
536 acidic proteins of sizes between 40 and 80 kDa and that can bind to Ca<sup>2+</sup> [8]. O-

537 glycosylation (or “mucin-type O-glycosylation”) indicates that these proteins carry this  
538 type of glycan to the side-arm hydroxyl groups of serine and threonine residues [52].  
539 Safranin O staining has been used to detect glycosaminoglycans [53] and mucins [54].  
540 All mucins are highly O-glycosylated, and the biosynthesis and degradation are perfectly  
541 integrated for protection of the cell against external aggressions [55]. The present  
542 findings clearly show that the presence of antibodies in the turbot immune serum acts  
543 as a stimulus that leads to the production of mucin-like proteins, as shown by Safranin  
544 staining. The stimulation also causes a significant increase in the expression of both the  
545 matrix proteins and the expression of the genes that encode them. The immunological  
546 assays revealed that the components of the capsule share epitopes with the matrix  
547 glycoproteins of the extrusomes.

548 In ciliate secretion systems,  $\text{Ca}^{+2}$  is necessary for stimulus-secretion coupling  
549 [56]. In *Paramecium* it has been shown that the exocytic release of the paracrystalline  
550 secretor product derived from the trichocyte matrix depends on  $\text{Ca}^{2+}$ , and the secretory  
551 signal probably involves an influx of calcium [57,58]. The role of calcium in exocytosis  
552 has been demonstrated in *Paramecium* following the application of  $\text{Ca}^{+2}$  ionophores,  
553 and direct microinjection of  $\text{Ca}^{+2}$  in the cells induces exocytosis of the trichocysts [59].  
554 On the other hand, in *Tetrahymena*, the addition of the anaesthetic dibucaine induces  
555 the synchronous secretion of mature mucocysts [60] via an increase in intracellular  $\text{Ca}^{+2}$   
556 [61] and the release of flocculent mucin [8]. In this study, we demonstrated that  
557 stimulation of *P. dicentrarchi* trophonts with antibodies in turbot serum induces  
558 discharge of intracellular  $\text{Ca}^{+2}$  and extrusion.

559 In conclusion, our findings indicate that *P. dicentrarchi* can overcome the  
560 agglutination generated by the specific antibodies produced by the host by generating  
561 capsules through the extrusome-mediated secretion of O-glycosylated matrix proteins  
562 that possess mucin-like characteristics, and whose release is regulated through  $\text{Ca}^{+2}$ -  
563 mediated signalling. The findings show that the ciliate uses exocytosis as a defence  
564 mechanism that probably allows evasion of the host immune response. Likewise,  
565 analysis of the extrusome matrix proteins in yeast by heterologous production  
566 technology, which has the advantage of producing glycosylated proteins, will allow us  
567 to develop recombinant proteins of potential use in vaccines for the immunoprophylaxis  
568 of scuticociliatosis in turbot.

569 **Acknowledgements**

570 This study was financially supported by grants from the Ministerio de Economía  
571 y Competitividad (Spain) and Fondo Europeo de Desarrollo Regional -FEDER- (European  
572 Union) (AGL2017-83577-R) and from the Xunta de Galicia (Spain) (ED431C2017/31) and  
573 also by the PARAFISHCONTROL project, which received funding from the European  
574 Union's Horizon 2020 research and innovation programme under grant agreement No.  
575 634429. This publication reflects the views of the authors, and the European  
576 Commission cannot be held responsible for any use which may be made of the  
577 information contained herein

578

579 **References**

580

- 581 1. Rosati G, Modeo L (2003) Extrusomes in ciliates: diversification, distribution, and  
582 phylogenetic implications. *J Eukaryot Microbiol* 50: 383-402.
- 583 2. Taylor WD, Sanders RW (2010) Protozoa. In: *Ecology and Classification of North*  
584 *American Freshwater Invertebrates*. Third Edition, (Thorp, JH & Covich AP, Eds.).  
585 Academic Press, pp: 49-90.
- 586 3. Haacke-Bell B, Hohenberger-Bregger R, Plattner H (1990) Trichocysts of *Paramecium*:  
587 secretory organelles in search of their function. *Eur J Protistol* 25: 289-305.
- 588 4. Benwitz G (1984) Die Entladung der Haptocysten von *Ephelota gemmipara* (Suctoria,  
589 Ciliata). *Z Naturforsch C* 39: 812-817.
- 590 5. Ricci N, Morelli A, Verni F (1996) The predation of *Litonotus* on *Euplotes*: a two-step  
591 cell-cell recognition process. *Acta Protozool* 35: 201-208.

- 592 6. Krainer KH (1991) Contribution to the morphology, infraciliature and ecology of the  
593 planktonic ciliates *Strombidium pelagicum* n. sp., *Pelagostrombidium mirabile*  
594 (Penard, 1916) n. g. n. comb., and *Pelagostrombidium fullax* (Zacharias, 1876) n.  
595 g., n. comb. (Ciliophora, Oligotrichida). Eur J Protistol 27: 60-70.
- 596 7. Modeo L, Petroni G, Bonaldi M, Rosati G (2001) Trichites of *Strombidium* (Ciliophora,  
597 Oligotrichida) are extrusomes. J Eukaryot Microbiol 48: 95-101.
- 598 8. Sauer MK, Kelly RB (1995) Conjugation rescue of exocytosis mutants in *Tetrahymena*  
599 *thermophila* indicates the presence of functional intermediates in the regulated  
600 secretory pathway. J Eukaryot Microbiol 42: 173-183.
- 601 9. Miyake A, Buonanno F, Saltalamachia P, Masaki ME, Lio H (2003) Chemical defence  
602 by means of extrusive cortical granules in the heterotrich ciliate *Climacostomun*  
603 *virens*. Eur J Protistol 39: 25-36.
- 604 10. Fyde J, Kennaway G, Adams K, Warren A (2006) Ultrastructural events in the  
605 predator-induced defence response of *Colpidium kleini* (Ciliophora:  
606 Humenostomatia). Acta Protozool 45: 461-464.
- 607 11. Iglesias R, Paramá A, Alvarez MF, Leiro J, Fernández J, et al. (2001)  
608 *Philasterides dicentrarchi* (Ciliophora, Scuticociliatida) as the causative agent of  
609 scuticociliatosis in farmed turbot *Scophthalmus maximus* in Galicia (NW Spain).  
610 Dis Aquat Organ 46: 47-55.

- 611 12. De Felipe AP, Lamas J, Sueiro RA, Folgueira I, Leiro JM (2017) New data on flatfish  
612 scuticociliatosis reveal that *Miamiensis avidus* and *Philasterides dicentrarchi* are  
613 different species. *Parasitology* 29: 1-18.
- 614 13. Mallo N, Lamas J, Leiro JM (2013) Evidence of an alternative oxidase pathway for  
615 mitochondrial respiration in the scuticociliate *Philasterides dicentrarchi*. *Protist*  
616 164: 824-836.
- 617 14. Mallo N, Lamas J, de Felipe AP, Sueiro RA, Fontenla F, et al. (2016). Role of H(+)-  
618 pyrophosphatase activity in the regulation of intracellular pH in a scuticociliate  
619 parasite of turbot: Physiological effects. *Exp Parasitol* 169: 59-68.
- 620 15. Piazzon MC, Wiegertjes GF, Leiro J, Lamas J. (2011) Turbot resistance  
621 to *Philasterides dicentrarchi* is more dependent on humoral than on cellular  
622 immune responses. *Fish Shellfish Immunol* 30: 1339-1347.
- 623 16. Piazzon MC, Leiro J, Lamas J (2014) Reprint of "fish immunity to scuticociliate  
624 parasites". *Dev Comp Immunol* 43: 280-289.
- 625 17. Blanco-Abad V, Noia M, Valle A, Fontenla F, Folgueira I, De Felipe AP, Pereiro P, et  
626 al. (2018) The coagulation system helps control infection caused by the ciliate  
627 parasite *Philasterides dicentrarchi* in the turbot *Scophthalmus maximus* (L.). *Dev*  
628 *Comp Immunol* 87: 147-156.
- 629 18. Dragesco A, Dragesco J, Coste F, Gasc C, Romestand B, et al. (1995) *Philasterides*  
630 *dicentrarchi*, n. sp. (Ciliophora, Scuticociliatida), a histophagous opportunistic

- 631 parasite of *Dicentrarchus labrax* (Linnaeus, 1758) a reared marine fish. Eur J  
632 Protistol 31: 327-340.
- 633 19. Paramá A, Arranz JA, Alvarez MF, Sanmartín ML, Leiro J (2006) Ultrastructure and  
634 phylogeny of *Philasterides dicentrarchi* (Ciliophora, Scuticociliatia) from farmed  
635 turbot in NW Spain. Parasitology 132: 555-564.
- 636 20. Iglesias R, Paramá A, Alvarez MF, Leiro J, Ubeira FM, et al. (2003) *Philasterides*  
637 *dicentrarchi* (Ciliophora:Scuticociliatida) expresses surface immobilization  
638 antigens that probably induce protective immune responses in turbot.  
639 Parasitology 126: 125-134.
- 640 21. Paramá A, Iglesias R, Álvarez M F, Leiro J, Aja C, et al. (2003) *Philasterides dicentrarchi*  
641 (Ciliophora, Scuticociliatida): experimental infection and possible routes of entry  
642 in farmed turbot (*Scophthalmus maximus*). Aquaculture 217: 73–80.
- 643 22. Iglesias R, Leiro J, Ubeira FM, Santamarina MT, Sanmartín ML (1993)  
644 *Anisakis simplex*: antigen recognition and antibody production in experimentally  
645 infected mice. Parasite Immunol 15: 243-250.
- 646 23. Lamas J, Sanmartín ML, Paramá A, Castro R, Cabaleiro S, et al. (2008). Optimization  
647 of an inactivated vaccine against a scuticociliate parasite of turbot: Effect of  
648 antigen, formalin and adjuvant concentration on antibody response and  
649 protection against the pathogen. Aquaculture 278: 22-26.
- 650 24. Livak KJ, Schmittgen TD (2001) Analysis of relative gene expression data using real-  
651 time quantitative PCR and the 2-(delta delta C(T)) method. Methods 25: 402-408

- 652 25. Bustin SA, Benes V, Garson JA, Hellemans J, Huggett J, et al. (2009) The MIQE  
653 guidelines: minimum information for publication of quantitative real-time PCR  
654 experiments. *Clin Chem* 55: 611-622.
- 655 26. Mallo N, Lamas J, Piazzon C, Leiro JM (2015) Presence of a plant-like proton  
656 translocating pyrophosphatase in a scuticociliate parasite and its role as a  
657 possible drug target. *Parasitology* 142: 449–462.
- 658 27. Mitchell AL, Attwood TK, Babbitt PC, Blum M, Bork P, et al. (2019) InterPro in 2019:  
659 improving coverage, classification and access to protein sequence  
660 annotations. *Nucleic Acids Res* gky1100
- 661 28. Käll L, Krogh A, Sonnhammer ELL (2004) A Combined Transmembrane Topology and  
662 Signal Peptide Prediction Method. *J Mol Biol* 338: 1027-1036.
- 663 29. Nielsen H (2017) Predicting Secretory Proteins with SignalP. In Kihara, D (ed): *Protein*  
664 *Function Prediction (Methods in Molecular Biology vol. 1611)* pp. 59-73,  
665 Springer.
- 666 30. Zhang Y-Z, Shen H-B (2017) Signal-3L 2.0: A hierarchical mixture model for enhancing  
667 protein signal peptide prediction by incorporating residue-domain cross level  
668 features. *J Chem Inf Model* 57: 988-999.
- 669 31. Steentoft C, Vakhrushev SY, Joshi HJ, Kong Y, Vester-Christensen MB, et al. (2013)  
670 Precision mapping of the human O-GalNAc glycoproteome through SimpleCell  
671 technology. *EMBO J* 32: 1478-1488.

- 672 32. Gasteiger E, Hoogland C, Gattiker A, Duvaud S, Wilkins MR, et al. (2005) Protein  
673 Identification and Analysis Tools on the ExpASY Server; (In) John M. Walker (ed):  
674 The Proteomics Protocols Handbook, Humana Press. pp. 571-607.
- 675 33. Waterhouse A, Bertoni M, Bienert S, Studer G, Tauriello G, et al. (2018) SWISS-  
676 MODEL: homology modelling of protein structures and complexes. Nucleic Acids  
677 Res 46(W1): W296-W303.
- 678 34. Passerini A, Lippi M, Frasconi P (2011) MetalDetector v2.0: Predicting the Geometry  
679 of Metal Binding Sites from Protein Sequence. Nucleic Acids Res 39: W288-  
680 W292.
- 681 35. Sievers F, Wilm A, Dineen D, Gibson TJ, Karplus K, et al. (2011). Fast, scalable  
682 generation of high-quality protein multiple sequence alignments using Clustal  
683 Omega. Mol Syst Biol 7: 539.
- 684 36. Zuckerkandl E, Pauling L (1965) Evolutionary divergence and convergence in protein.  
685 Edited in Evolving genes and proteins by V. Bryson and H.J. Vogel. Pp. 97-166.  
686 Academic Press, New York.
- 687 37. Kumar S, Stecher G, Tamura K (2016) MEGA7: Molecular evolutionary genetic  
688 analysis version 7.0 for bigger datasets. Mol Biol Evol 33: 1870-1874.
- 689 38. Buonanno F, Ortenzi C (2016) Cold-shock based method to induce the discharge of  
690 extrusomes in ciliated protists and its efficiency. J Basic Microbiol 56: 586-590.
- 691 39. McArdle EW, Bergquist BL, Ehret CF (1980) Structural Changes in *Tetrahymena*  
692 *rostrate* during Induced encystment. J Protozool 27: 388-397.



- 693 40. Tiedtke A (1976) Capsule shedding in *Tetrahymena*. *Naturwissenschaften* 63: 93.
- 694 41. Hünseler P, Scheidgen-Kleyboldt G, Tiedtke A (1987)  
695 Isolation and characterization of a mutant of *Tetrahymena thermophila* blocked  
696 in secretion of lysosomal enzymes. *J Cell Sci* 88: 47-55.
- 697 42. Rawlinson NG, Gates MA (1989) A structural study of induced capsule formation in  
698 the ciliate *Colpidium colpoda*. *Trans Am Microsc Soc* 108: 354-368.
- 699 43. Hausmann K (1978) Extrusive organelles in protists. *Int Rev Cytol* 52: 197-276.
- 700 44. Shih SJ, Nelson DL (1991) Multiple families of proteins in the secretory granules of  
701 *Paramecium tetraurelia*: immunological characterization and  
702 immunocytochemical localization of trichocyst proteins. *J Cell Sci* 100: 85-97.
- 703 45. Madeddu L, Gautier MC, Vayssié L, Houari A, Sperling L (1995) A large multigene  
704 family codes for the polypeptides of the crystalline trichocyst matrix in  
705 *Paramecium*. *Mol Biol Cell* 6: 649-659.
- 706 46. Adoutte A, Garreau de Loubresse N, Beisson J (1984) Proteolytic cleavage and  
707 maturation of the crystalline secretion products of *Paramecium*. *J Mol Biol* 180:  
708 1065-1080.
- 709 47. Gautier MC, Garreau de Loubresse N, Madeddu L (1994) Evidence for defects in  
710 membrane traffic in *Paramecium* secretory mutants unable to produce  
711 functional storage granules. *J Cell Biol* 124: 893-902.

- 712 48. Tindall SH, De Vito LD, Nelson DL (1989) Biochemical characterization of the  
713 *Paramecium* secretory granules. J Cell Sci 92: 441-447.
- 714 49. Glas-Albrecht R, Németh A, Plattner H (1990)  
715 Secretory proteins and glycoproteins from *Paramecium* cells. Eur J Protistol 26:  
716 149-159.
- 717 50. Maihle NJ, Satir BH (1986) Protein secretion in *Tetrahymena thermophila*.  
718 Characterization of the major proteinaceous secretory proteins. J Biol Chem 261:  
719 7566-7570.
- 720 51. Wolfe J (1988) Analysis of *Tetrahymena* mucocyst material with lectins and alcian  
721 blue. J Protozool 35: 46-51.
- 722 52. Corfield AP, Berry M (2015) Glycan variation and evolution in the eukaryotes. Trends  
723 Biochem Sci 40: 351-359.
- 724 53. Qin X, Jin P, Jiang T, Li M, Tan J, Wu H, Zheng L, Zhao J (2018) A human chondrocyte-  
725 derived *in vitro* model of alcohol-induced and steroid-induced femoral  
726 head necrosis. Med Sci Monit 24: 539-547.
- 727 54. Tas J (1977) The Alcian Blue and combined Alcian Blue-Safranin O staining of  
728 glycosaminoglycans studied in a model system and in mast cell. Histochem J 9:  
729 205-230.
- 730 55. Corfield AP (2015) Mucins: a biologically relevant glycan barrier in mucosal  
731 protection. Biochim Biophys Acta 1850: 236-252.

- 732 56. Gilligan DM, Satir BH (1983) Stimulation and inhibition of secretion in *Paramecium*:  
733 role of divalent cations. J Cell Biol 97: 224-234.
- 734 57. Garofalo RS, Satir BH (1984) *Paramecium* secretory granule control: quantitative  
735 studies on *in vitro* expansion and its regulation by calcium and pH. J Cell Biol 99:  
736 2193-2199.
- 737 58. Satir BH. (1989) Signal transduction events associated with exocytosis in ciliates. J  
738 Protozool 36: 382-389.
- 739 59. Kerboeuf D, Cohen J (1996) Inhibition of trichocyst exocytosis and calcium influx in  
740 *Paramecium* by amiloride and divalent cations. Biol Cell 86: 39-43.
- 741 60. Satir B (1977) Dibucaine-induced synchronous mucocysts secretion in *Tetrahymena*.  
742 Cell Biol Int Rep 1: 69-73.
- 743 61. Tiedtke A, Hünseler P, Rasmussen L. (1988) Growth requirements of a new food-  
744 vacuole-less mutant of *Tetrahymena*. Eur J Protistol 23: 350-353.
- 745  
746  
747  
748  
749  
750  
751  
752  
753  
754  
755

756 FIGURE LEGENDS:

757

758 Figure 1.- Microphotographs obtained by differential interference contrast microscopy  
759 showing *P. dicentrarchi* trophonts after being incubated for 30 min with (A) preimmune  
760 serum, and (B) immune serum. The lower table shows the effect of different dilutions of  
761 turbot immune serum (antibody titre) and different incubation times on agglutination  
762 of ciliates (results expressed as percentages).

763

764 Figure 2.- Microphotographs obtained by differential interference contrast microscopy  
765 showing the sequence of changes after agglutination of the *P. dicentrarchi* trophonts  
766 caused by the addition of the turbot immune serum (up to 6 h incubation), including the  
767 presence of empty capsules (arrows).

768

769 Figure 3.-Microphotographs obtained by scanning electron microscope (SEM) of *P.*  
770 *dicentrarchi* trophonts, showing the changes in the ciliate surface after the addition of  
771 the turbot immune serum (up to 6 h incubation).

772

773 Figure 4.- (A,B) Microphotographs obtained by transmission electron microscopy (TEM)  
774 of *P. dicentrarchi* trophonts showing the structure of the two basic types of extrusomes:  
775 A) spherical extrusomes (circle) of mucocyst type (M), and a detailed enlargement of  
776 these structures in the upper right-hand side of the image; (B) fusiform extrusomes  
777 (circle) of trichocyst type (T), and a detailed enlargement of these structures in the upper  
778 right-hand side of the image. C-D) amino acid sequence of *P. dicentrarchi* trichocyst  
779 matrix protein T2-A and T4-B (TMPT2A and TMPT4B, respectively). The shaded region  
780 indicates the prediction of a signal peptide between aa 1-18 (C) and aa 1-16 (D); bold  
781 red indicates the potential O-glycosylation sites of the proteins. Homology modelling  
782 (Swiss-model) including molecular weight prediction and theoretical isoelectric point  
783 (ip) of the TMPT2A (E) and TMPT4B (F) proteins of the *P. dicentrarchi* trichocyst matrix.  
784 Scale bar = 2  $\mu$ m.

785

786 Figure 5.- A) CLUSTAL OMEGA (v.1.2.4) multiple sequence alignment of *P. dicentrarchi*  
787 trichocyst matrix protein T2-A from four representative ciliates of the phylum

788 Ciliophora. B) Percent Identity Matrix - created by Clustal 2.1 C) Molecular Phylogenetic  
789 analysis by Maximum Likelihood method. The tree is drawn to scale, with branch lengths  
790 measured in the number of substitutions per site. The analysis involved 4 amino acid  
791 sequences. All positions containing gaps and missing data were eliminated. The final  
792 data set included a total of 367 positions. Evolutionary analysis was conducted with  
793 MEGA7 software.

794

795 Figure 6.- A) CLUSTAL OMEGA (1.2.4) multiple sequence alignment of *P. dicentrarchi*  
796 trichocyst matrix protein T4-B of four representative ciliates of the phylum Ciliophora B)  
797 Percent Identity Matrix - created by Clustal 2.1 C) Molecular Phylogenetic analysis by  
798 Maximum Likelihood method. The tree is drawn to scale, with branch lengths measured  
799 in the number of substitutions per site. The analysis involved 4 amino acid sequences.  
800 All positions containing gaps and missing data were eliminated. The data set included a  
801 total of 354 positions. Evolutionary analysis was conducted with MEGA7 software.

802

803 Figure 7.- Histochemistry analysis of mucin production (a peptidoglycan component of  
804 extrusomes) by safranin O staining of *P. dicentrarchi* trophonts after incubation with A)  
805 control serum, B) immune turbot serum for 30 min, C) immune turbot serum for 2 h, D)  
806 with immune turbot serum for 6h.

807

808 Figure 8.- (A) SDS-PAGE analysis of the recombinant *P. dicentrarchi* trichocyst matrix  
809 protein T2-A (rTMPT2A), lane 1. MW: Molecular weight markers in kD. (B) FELISA of  
810 levels of TMPT2A expressed by the trophonts incubated for 30 min and 6 h with the  
811 turbot immune serum. Values are means  $\pm$  standard errors. The symbol indicates a  
812 significant difference ( $P < 0.01$ ) relative to the control (time 0). (C) Microphotographs  
813 obtained by confocal / phase contrast microscopy of *P. dicentrarchi* trophonts incubated  
814 with immune serum for different times. The images correspond to the combination of a  
815 visible image and an immunofluorescence (green signal) using a recombinant mouse  
816 antibody anti-*P. dicentrarchi* TMPT2A and revealed with an anti-mouse rabbit antibody  
817 conjugated with FITC.

818

819 Figure 9.- (A) Levels of mRNA expression of the genes that encode the *P. dicentrarchi*  
820 trichocyst matrix protein T2-A (TMPT2A) and *P. dicentrarchi* trichocyst matrix protein  
821 T4-B (TMPT4B) in ciliates incubated for different lengths of time with turbot immune  
822 serum and dibucaine (D). The results are expressed as the relative gene expression  
823 versus the *P. dicentrarchi* elongation factor 1-alpha (EF1 $\alpha$ ). (B) Calcium response of  
824 trophonts stimulated with turbot immune serum (ITS) and Hanks' balanced salt solution  
825 (HBSS without Ca<sup>2+</sup>, Mg<sup>2+</sup>, and phenol red) quantified using the Fluo-4 NW calcium assay  
826 kit. The time course of the increase in fluorescence by min ( $\Delta F/\text{min}$ ) of cell-permeable  
827 fluorescent dye reflects the rates of dye-loading of cells by passive uptake of the AM  
828 esters and the influx of calcium through membrane channels or release from  
829 intercellular stores. The values at each data point are the mean  $\pm$  standard error (SE) for  
830 five replicates. Asterisks indicate a statistically significant difference ( $P < 0.01$ ) relative to  
831 control (time 0).

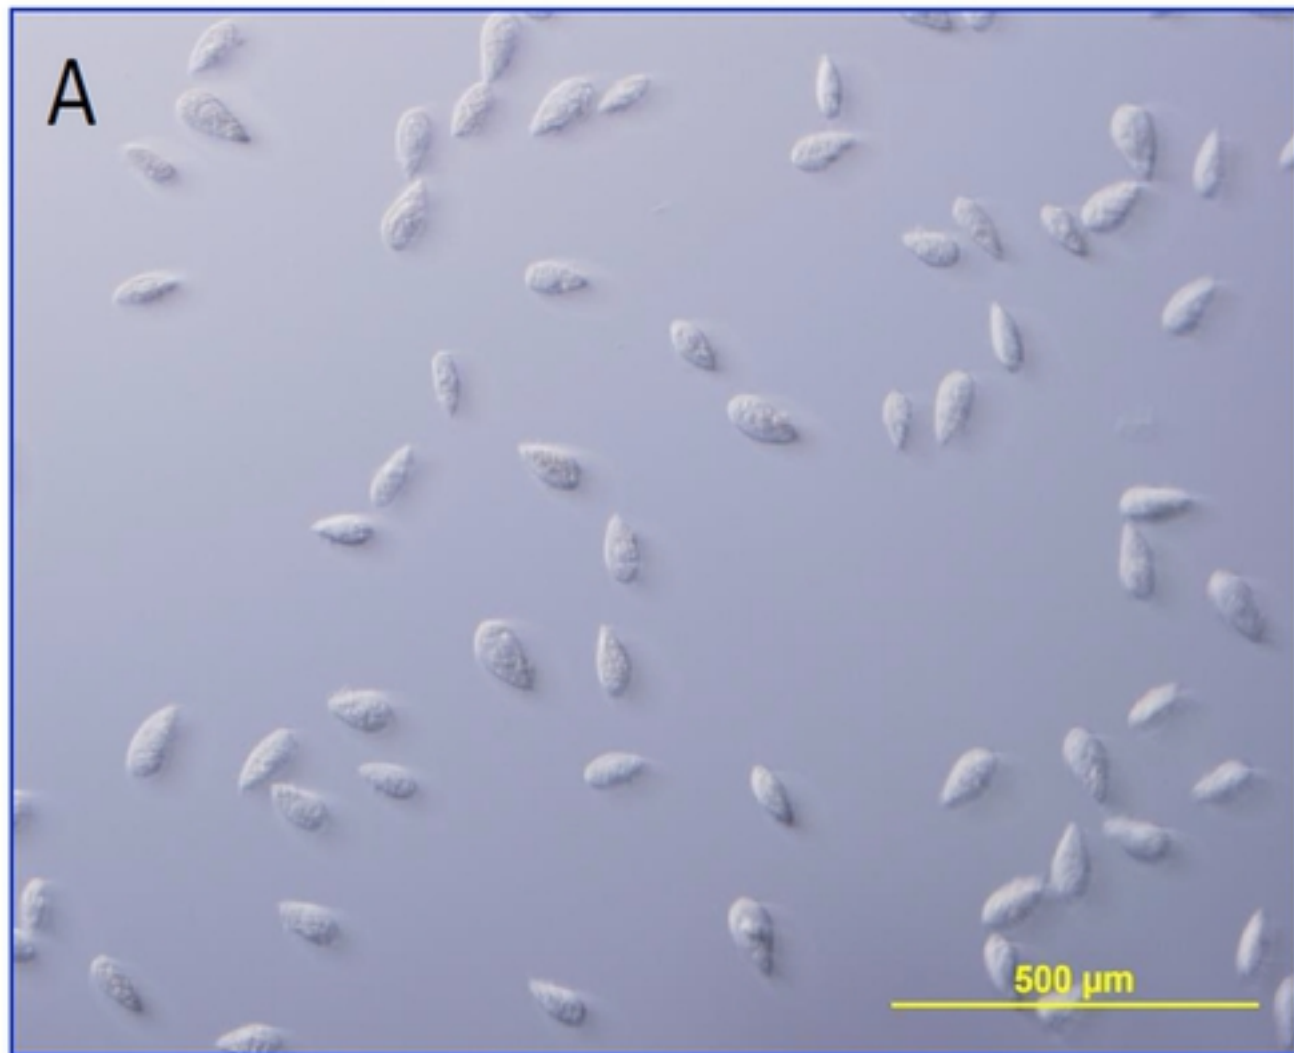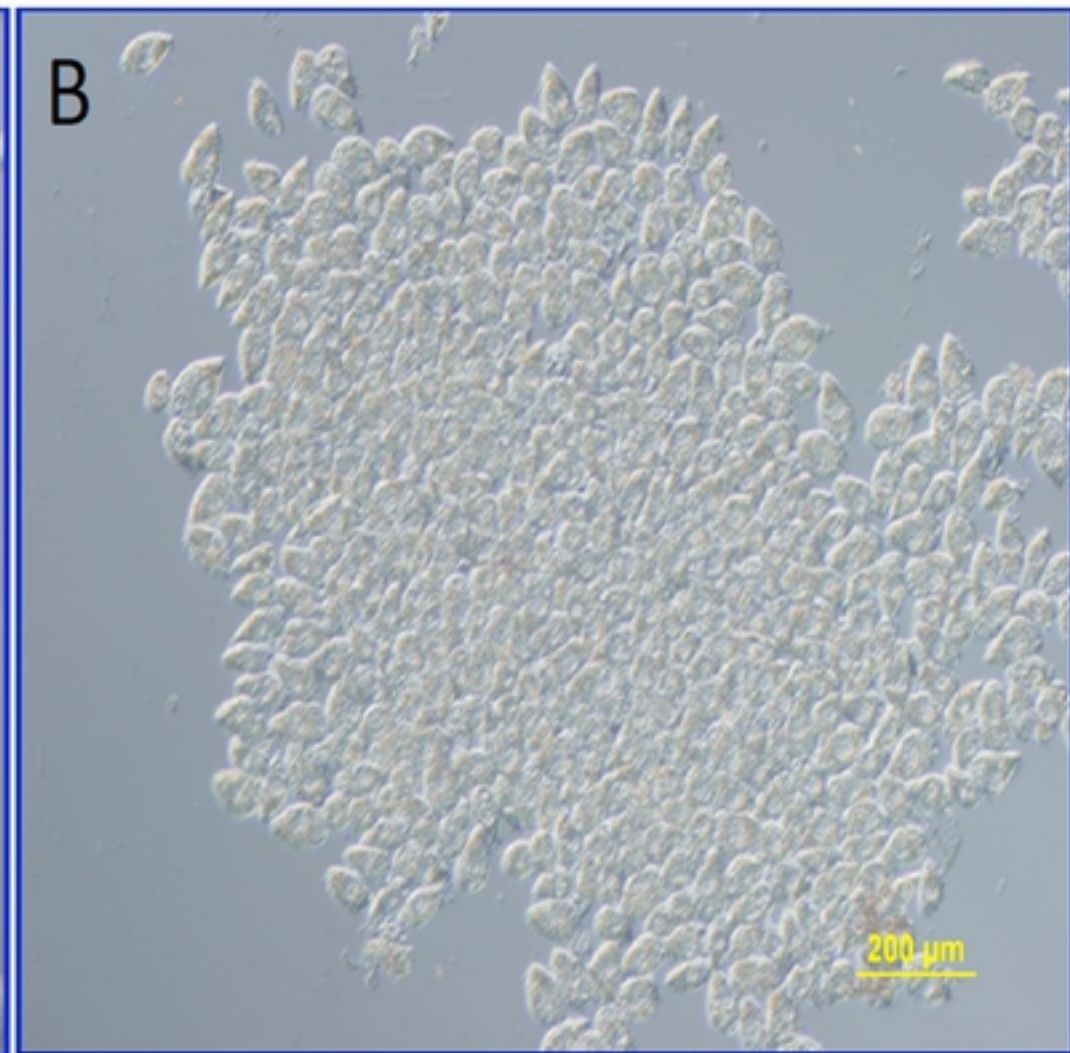

| Serum titre |        |        |        |        |        |        |        |        |        |
|-------------|--------|--------|--------|--------|--------|--------|--------|--------|--------|
|             | 1:25   |        |        | 1:50   |        |        | 1:100  |        |        |
|             | 15 min | 30 min | 60 min | 15 min | 30 min | 60 min | 15 min | 30 min | 60 min |
|             | 27%    | 59%    | 77%    | 26%    | 59%    | 85%    | 31%    | 38%    | 46%    |

Figure 1

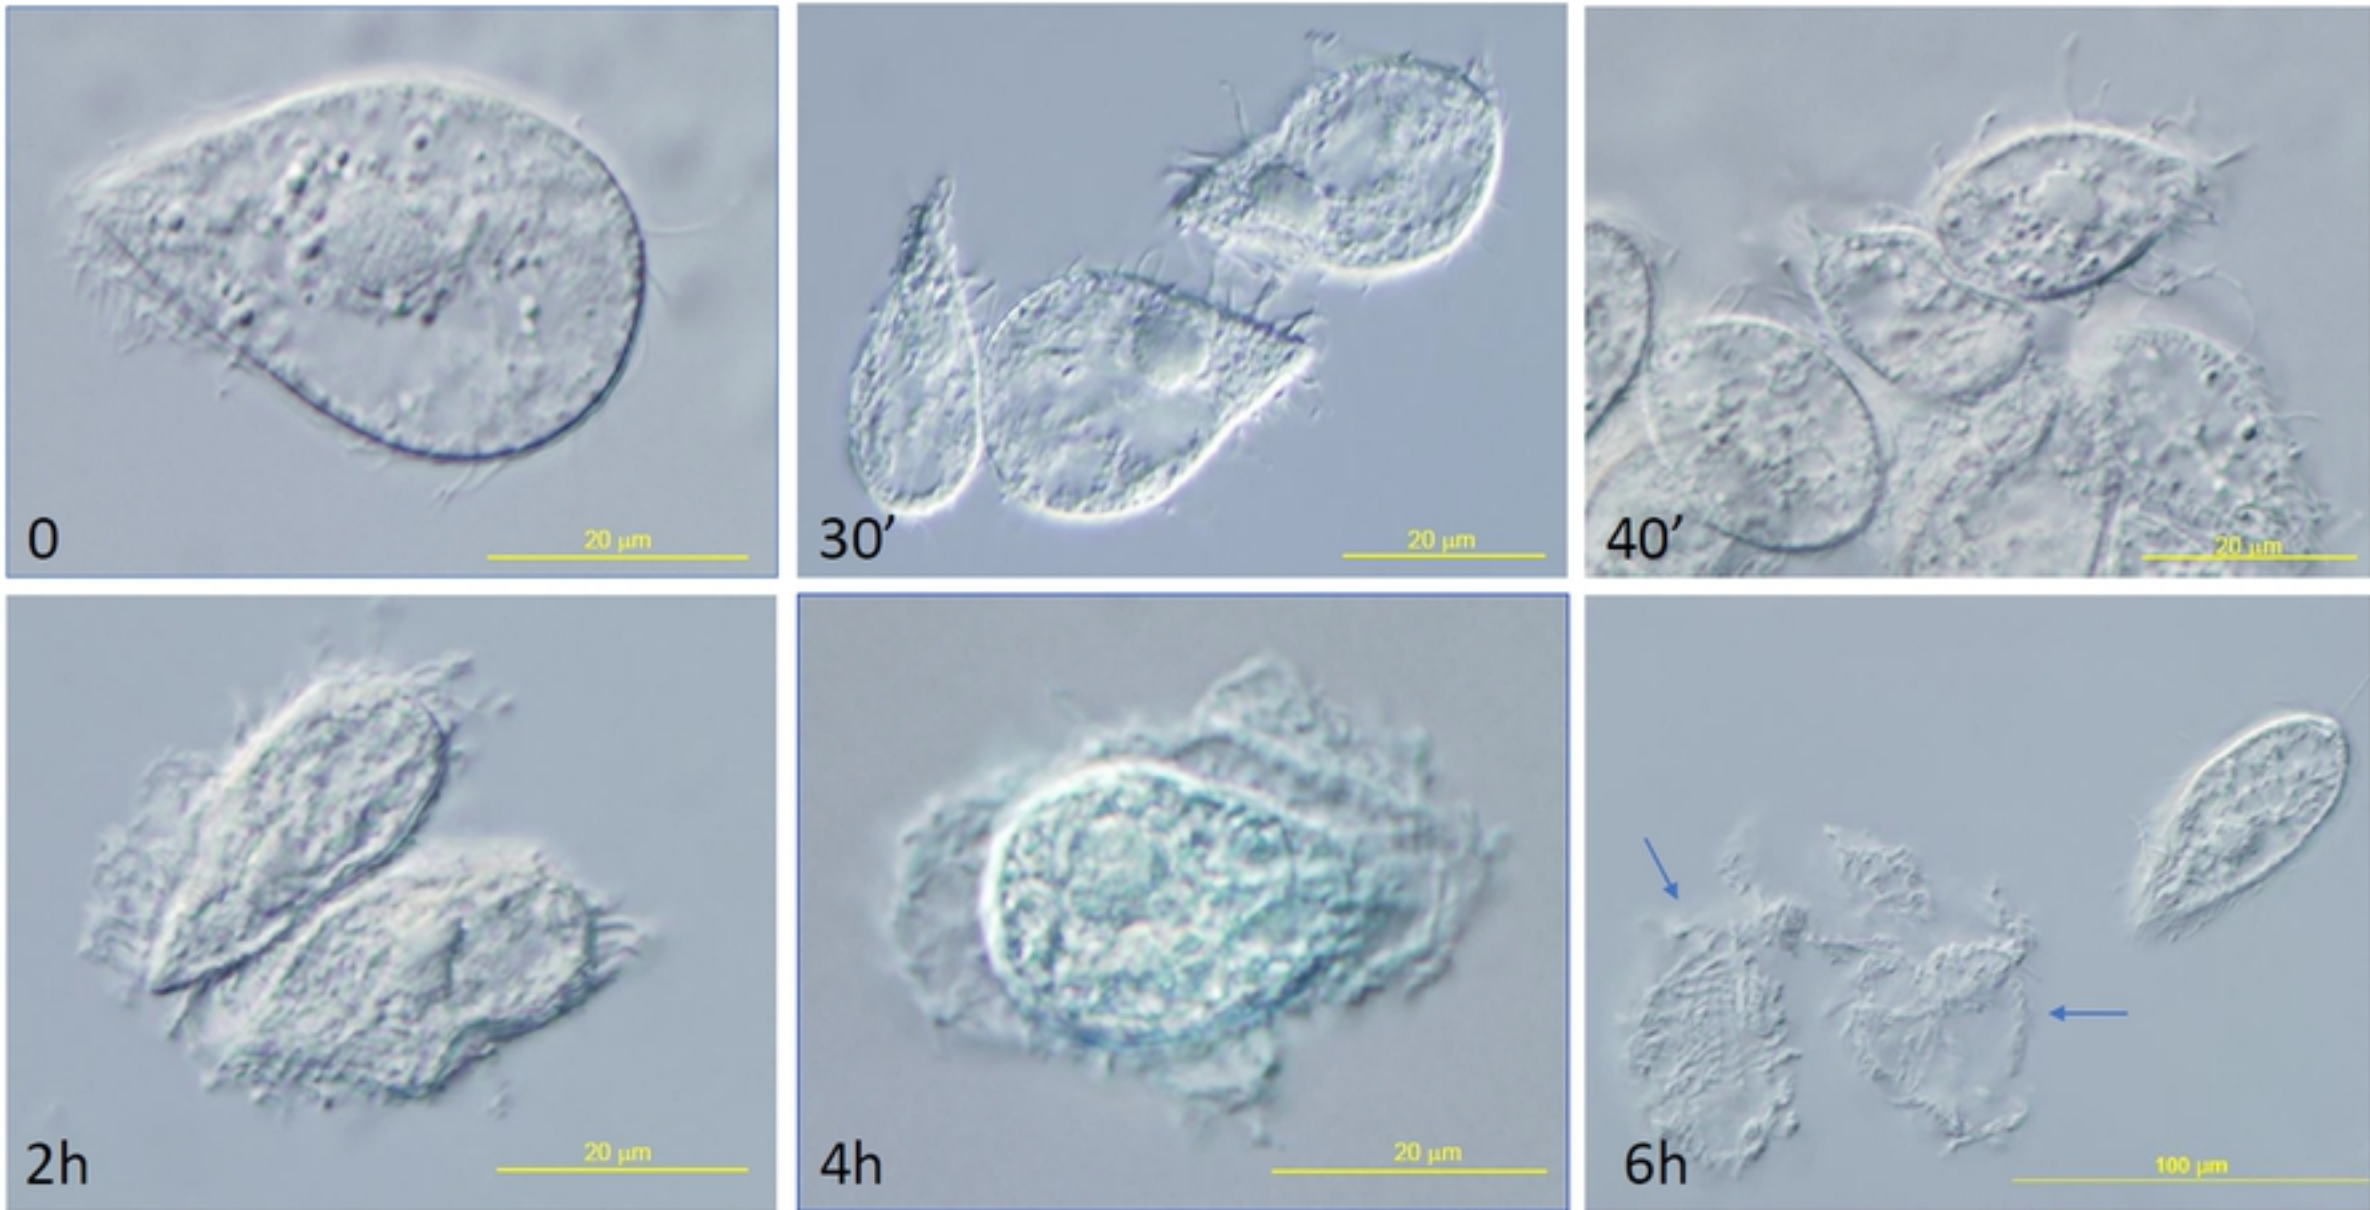

Figure 2



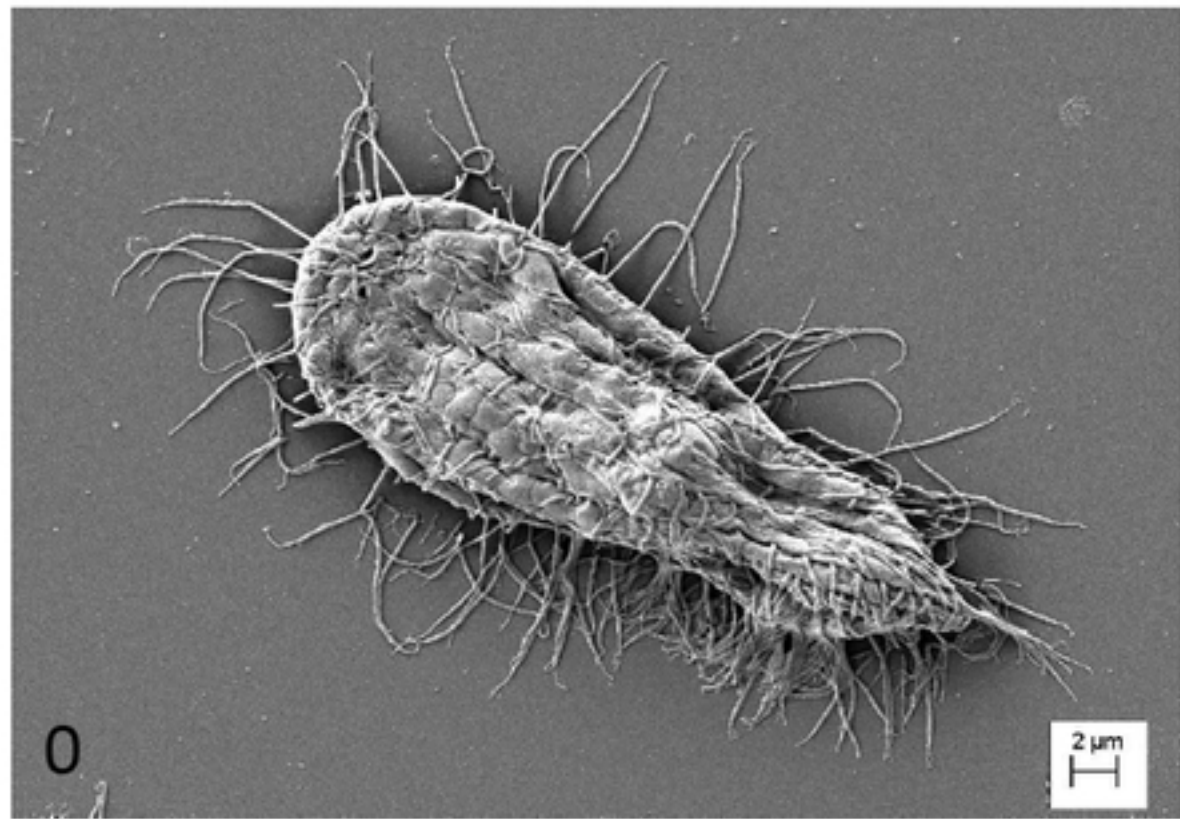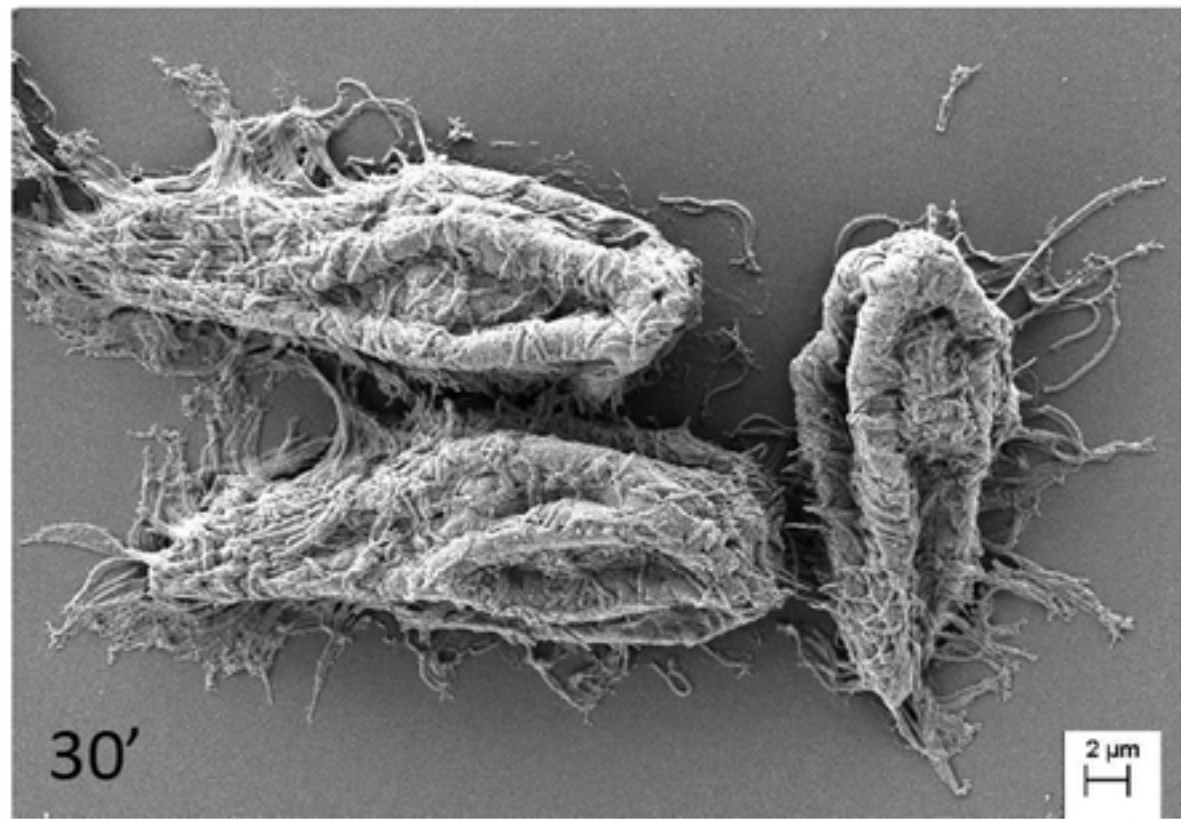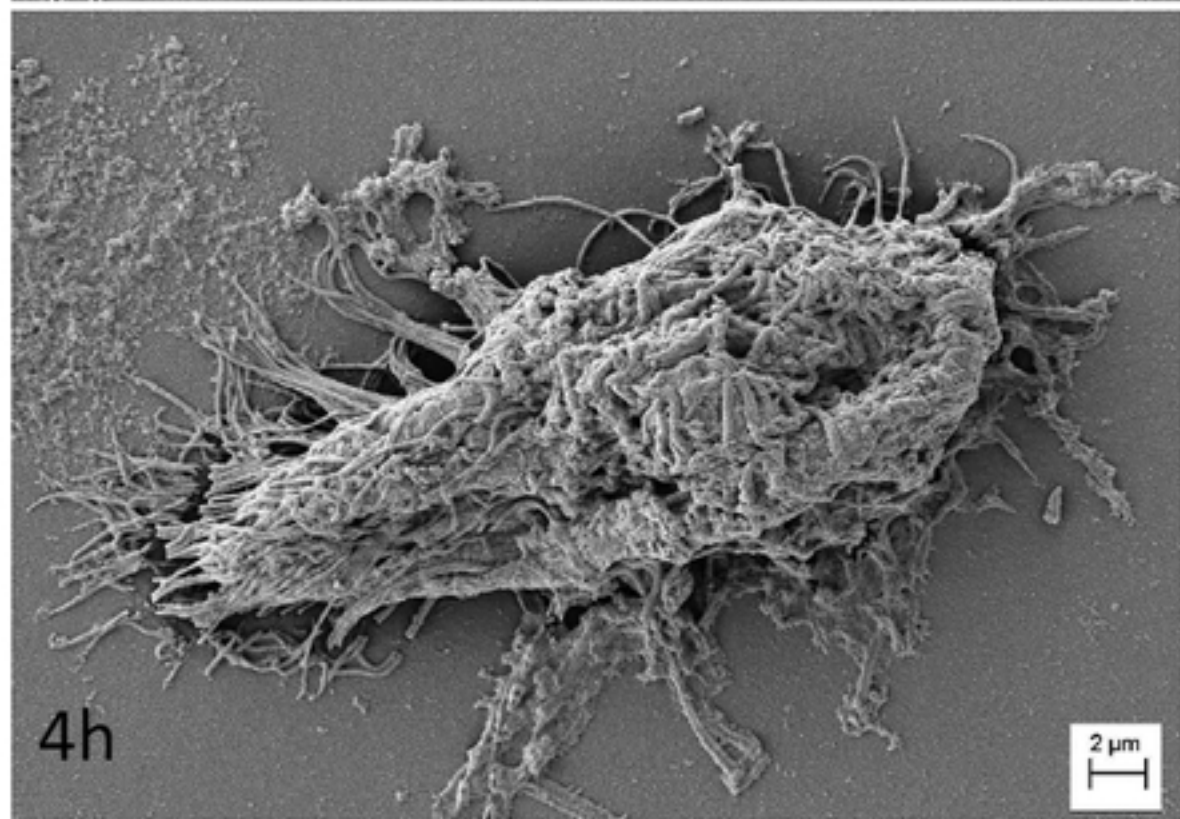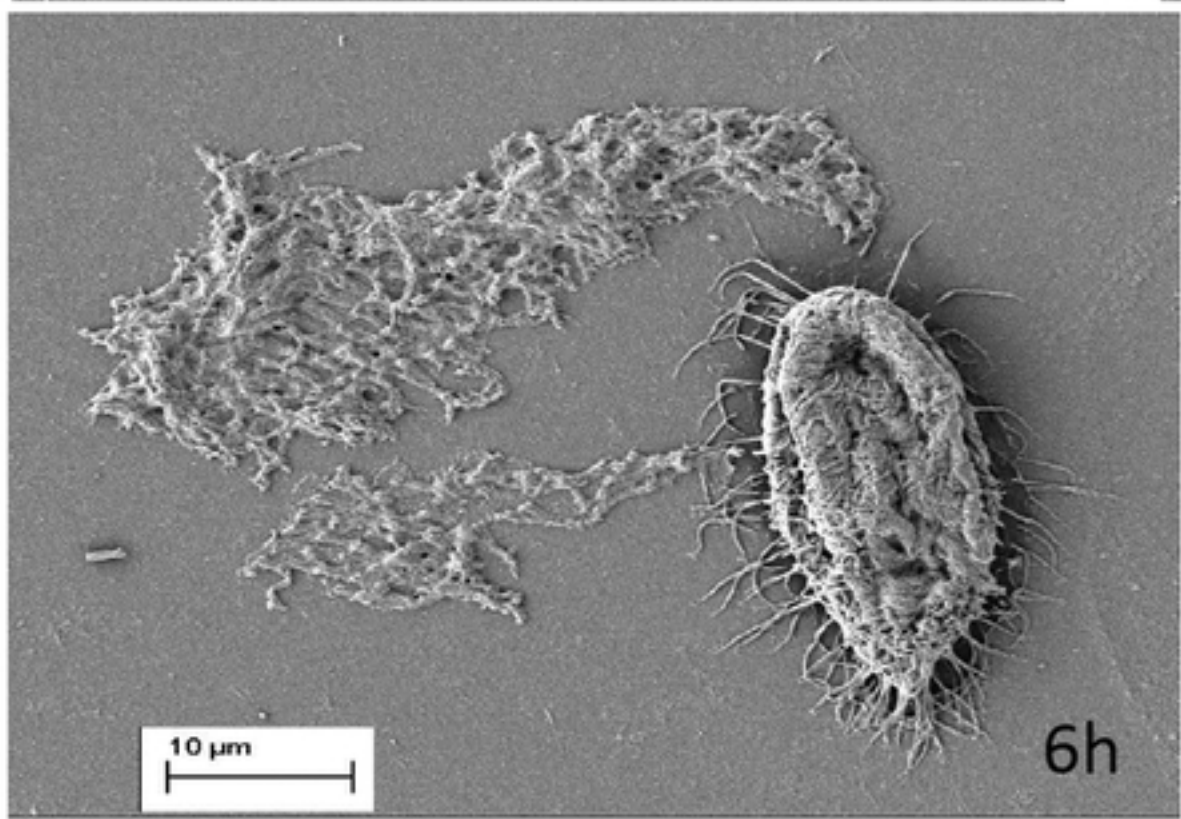

Figure 3

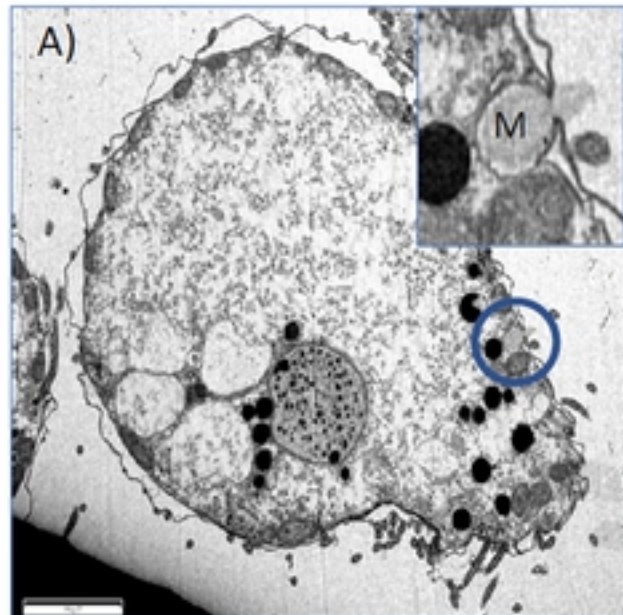

C) **MRVLTALFACVLVLGAF**AVTDPEIASVVRKMENSKYGKTLTLLDTIALQMEA  
 GDPVQDLIDMLQETEDGLERAQDEDEDEFIRNEQERCDVDLARLQGEIED  
 AARRIAELQAELDEKIPIRDEKVRVLGKNEWKDHLEAKVAEIDSQKVLKD  
 QEWAESEQHDQAQYVIEKAKTIIVEALKAN**S**FLQKGN**T**AFAQV**SS**HF  
 AKH**S**KTHFKRQ**S**WSKIFNLLSQI**TSS**APVQADQGSVQKVIDLDCSLLD  
 KISESREIERRDYQHWMEEYKNFRNQLLDKLVQVNKEIADLEQQIAALNK  
 RIAQCQAEKADQEERFRQKT**S**EHEDLLQYCCDANVAYAKRRESRNDERE  
 VV**S**DAIGLLQSKLRTFRQYV**S**ERMGSDVKRAD

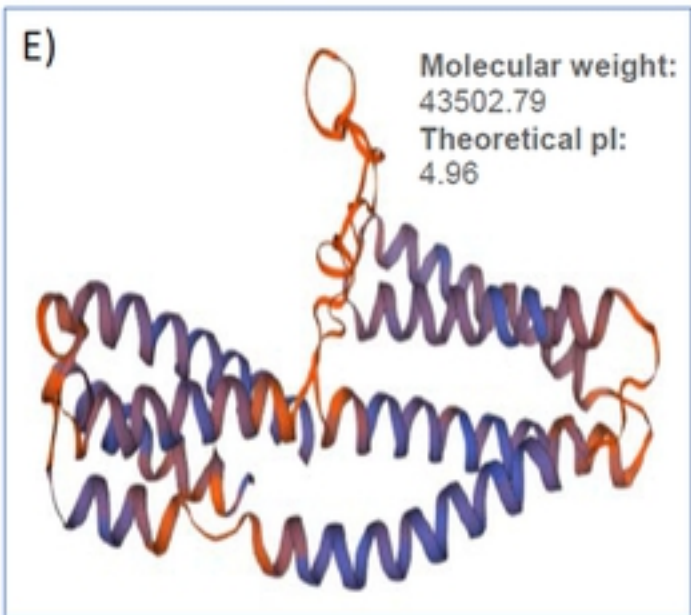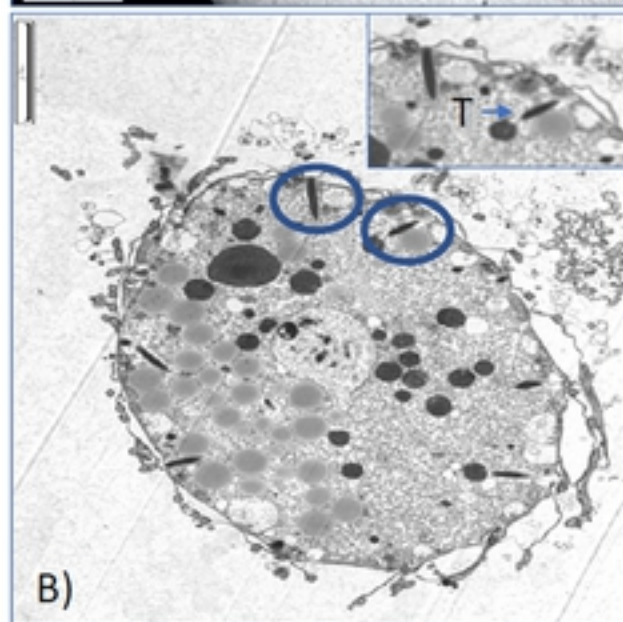

D) **MKRVAIIILLTLVLSQC**GIQR**S**PARLS**D**T**K**TVLAEMDKDSFGSTILSAVAL  
 NAA**T**GNPVEEITVLEEIVEQLTTEQNOADGLNTQNEASCETNIDNLN  
 QQIAQ**T**KATIES**T**ENALKINSEILKDAKVTLAQANRDFDEVVESIDQG  
**S**QQRRADHERWVEEDYANAISIATLEEGVKLINHMIHGVEFTQIKSRY  
 EKVLDKLIKEDNNKHASLFKPLIS**S**LTQLATRLNYENVMKILELLNNIRLTI  
 AEEQQQAKEAENIASEDWQKLLNHAAEKQRLGDKKARLS**S**LIEA**TT**  
**T**LLEQYRQ**S**LENNKVQLENYSQTLVNETQRCSQQAETYAVESAERAR  
 ELEILERLLEHMREKYNQVSEYVSSRVYSDF

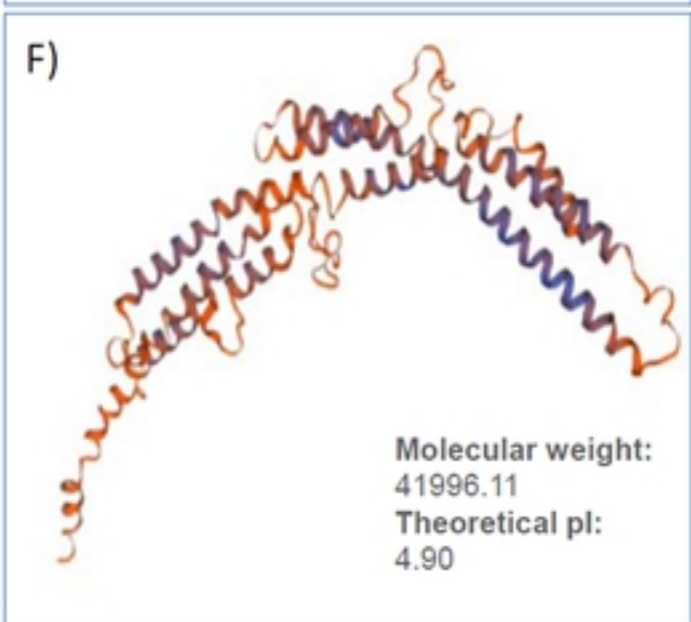

Figure 4

A)

Paramecium -----MKTIIFALALIVLASS-TQADIIAKIKKIDNSPFGRTL F  
 Philasterides -----MRVLTALFACVLVLGAFVTDPEIASVVRKMENSKYGKTL L  
 Ichthyophthirius KFQKRNNKKKINKQIKKKKIIMNKTAFFIALFIILTSALKLEQVNTQLKQIEKTKFGKNLL  
 Tetrahymena -----MKIIIIIFLASLFVFSTALTADNAINLQKIEKSRFGRNLL  
 : \* : : : : : : : : : : \* : : : :

Paramecium DTIWLLELQTGQPLDRLIQTLTDLEDRYVAEQKEDDARNHEYQDACTVDISAFDKDLAESN  
 Philasterides DTIALQMEAGDPVQDLIOMLQETEDGLERAQOEDDEFIRNEQERCVDLRLARLQGEIEDAA  
 Ichthyophthirius DMIQLSLTTSEHIDDLVEFLKLNLDNLVKEQSDDSENKRIGAECEEEVARLTQEI SEAK  
 Tetrahymena DTIQQLSVNDQIGRLVSDQLNIATDIQNDQAQQKQTERIQQCNSDLSRLLEDEIQDAN  
 \* \* \* : : : : \* : \* : \* : : \* : : : : : :

Paramecium RKKIELEEARLEGLYQREILQGLVAQKQAEVKGYQKDLDELDAQRAEENADFEKVL E H  
 Philasterides RRIAELQAELEDEKI-PIRDEKVRVLGKNEWKDHLEAKVAEIDSQKVLKQGEWAE EQE QH  
 Ichthyophthirius QKSSSELQSEINAKT-PVQLQKQILLKENESQKVEYQK SIVDLDAFKEEVDKLMATVQDDH  
 Tetrahymena LKVIESTSDITENT-PILEQKKILLKQKSESLTANQQILSDLDQMYEKKS AEYEAEREEH  
 : \* : : : \* : : : : : : : : : \* : . : : \*

Paramecium QEATAIIAEARRLFADNIEH-ESFIQK GKATKKPAHTFTREVASMIQKHFTQS AKKTAKF  
 Philasterides DQAQYVIEKAKTIIVEALKA-NSFLQKGN---TA-----FAQVSSHFAKHS-KT--H  
 Ichthyophthirius QKATYTIQRAKDVIVGEFQKGS AFLQRKD---IN-----FVQLSKHFSOSARHN--N  
 Tetrahymena SKAESVIREAKEILQGTFGSTKSFISIKKPSVQS-----FVQVSNHFSHHS-KT--N  
 : \* \* \* : : : : : \* : . . : : : : : : : : : : : : :

Paramecium QHRKGYSKLFAKAFATIASKAELADAGAVQKIIDLAE LLAKIADS LALLRFAEDKRVEA  
 Philasterides FKRRQSKIFNLLSQITSSAPVQADQGSVQKVIDLCO SLLDKISESREIERRDYQHMMEE  
 Ichthyophthirius FQKKS WNKLFKVLSQITASAPVQADSGAIQKIVELCOE LLSKLD E SLLQERQMYNHQVAV  
 Tetrahymena YKRKSWNSFFRILSQLSQSAPIQADPGALQKLF EVIDELLEKIADSLEIAKAFEQFEQD  
 : : : : : \* : : : : \* \* \* : : : : : : : : \* : \* \* : : : :

Paramecium YKKQRNFVVIATVAGTSLANAQADL AALNDLIAQVEATLDTTNQRIENVTADRTDRFTQ  
 Philasterides YKNFRNQLLDKLVQV NKEIADLEQQIAALNKRIAQQCAEKADQEERFRQKTSEHEDLLQY  
 Ichthyophthirius YHDEREAAVQHLQETQLHIDNLTAEIHTLKSRIEQCENKTSQDERAVEKEEELSKRN IY  
 Tetrahymena YENKDDIILDRIGVLQKVIGELDGEISSLEAQLQEDARVKVQVQERSEEKQTELNSRQAF  
 \* : : : : : : : : : : : \* : : : : : : : : : : \* : : : :

Paramecium CEEAVQDYEDSRAARTSDRDVWSETIGLVNKELRTLREQLALRQSAGDEI--  
 Philasterides CODANAYAKRRESRNDEREVWSDAIGLLQSKLRTFRQYVSERMGSDVKRAD  
 Ichthyophthirius CFDQQEQYKLRSQQRDEQLKIVREVLDIINSQLRVLKKYVGDRTD-----  
 Tetrahymena CTDQQSQFESRTQERNEQLDTIKQVTDIINSQMKV LKKYVTERSD EQSQ---  
 \* : : : \* : : : : : : : : : : : : : : : : : : : \* .

B)

|                         | <i>Paramecium</i> | <i>Ichthyophthirius</i> | <i>Philasterides</i> | <i>Tetrahymena</i> |
|-------------------------|-------------------|-------------------------|----------------------|--------------------|
| <i>Paramecium</i>       | 100.00            | 30.91                   | 26.90                | 24.60              |
| <i>Philasterides</i>    |                   | 100.00                  | 32.97                | 30.29              |
| <i>Ichthyophthirius</i> |                   |                         | 100.00               | 37.03              |
| <i>Tetrahymena</i>      |                   |                         |                      | 100.00             |

C)

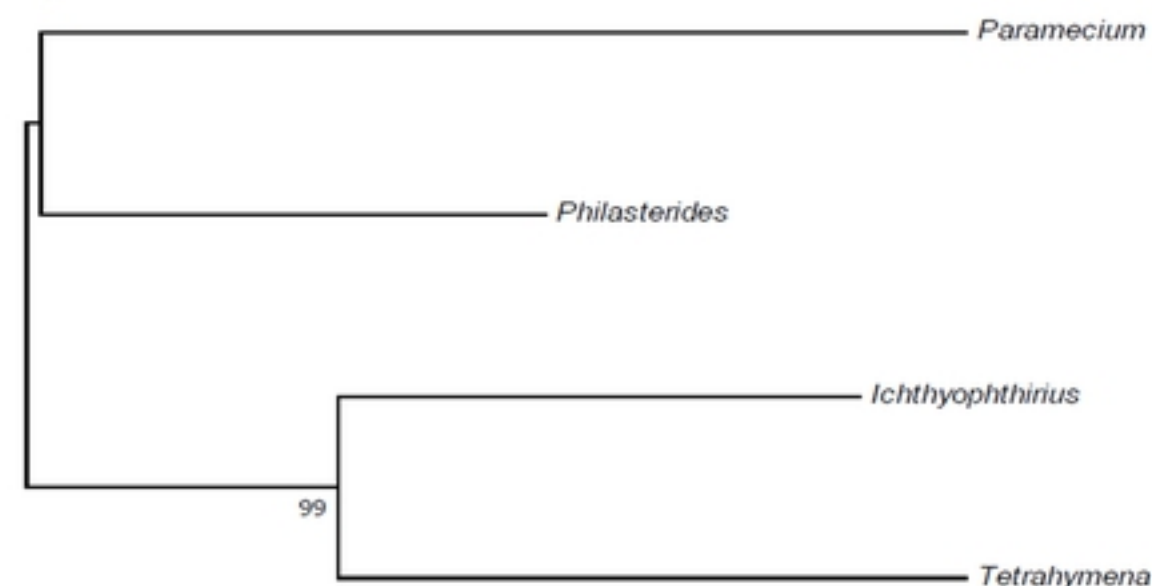

Figure 5

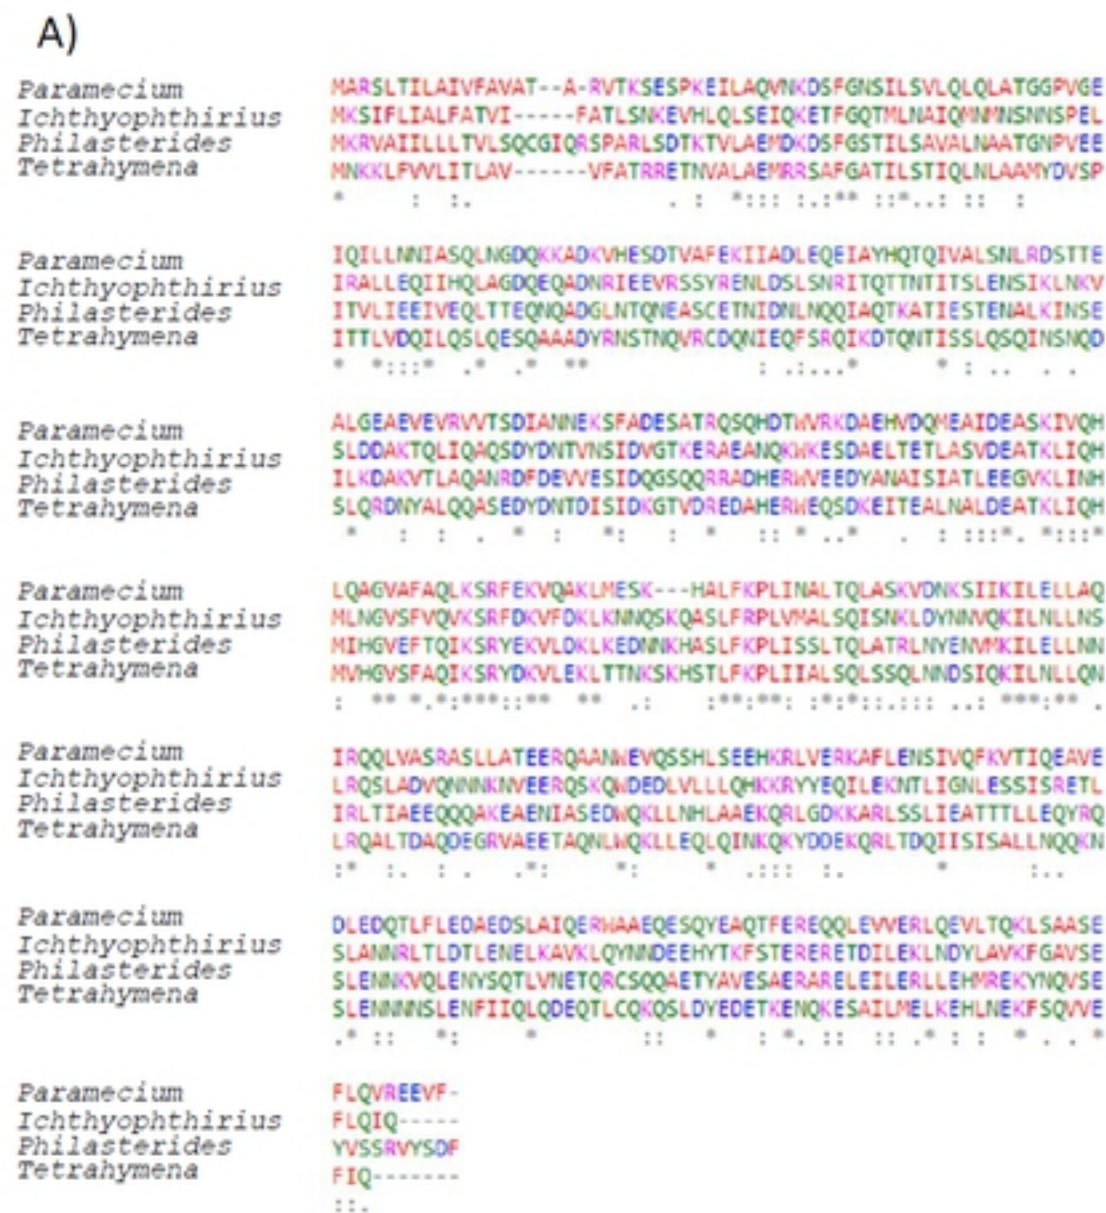

**B)**

|                         | <i>Paramecium</i> | <i>Ichthyophthirius</i> | <i>Philasterides</i> | <i>Tetrahymena</i> |
|-------------------------|-------------------|-------------------------|----------------------|--------------------|
| <i>Paramecium</i>       | 100.00            | 28.65                   | 31.68                | 30.23              |
| <i>Ichthyophthirius</i> |                   | 100.00                  | 36.11                | 36.97              |
| <i>Philasterides</i>    |                   |                         | 100.00               | 40.06              |
| <i>Tetrahymena</i>      |                   |                         |                      | 100.00             |

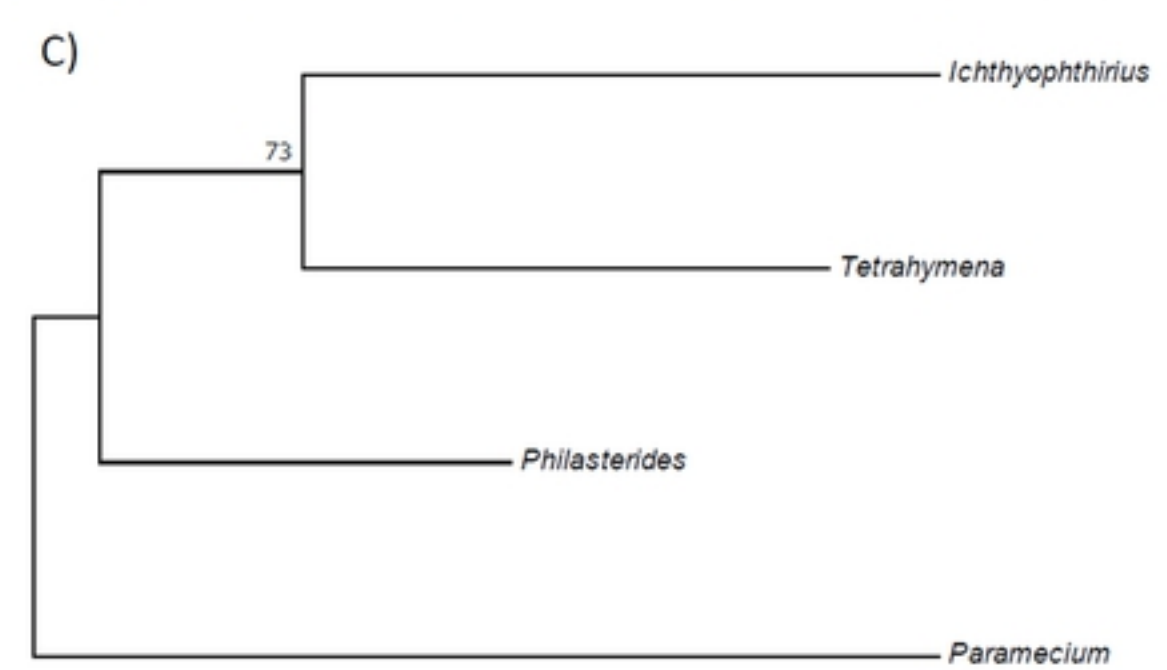

Figure 6

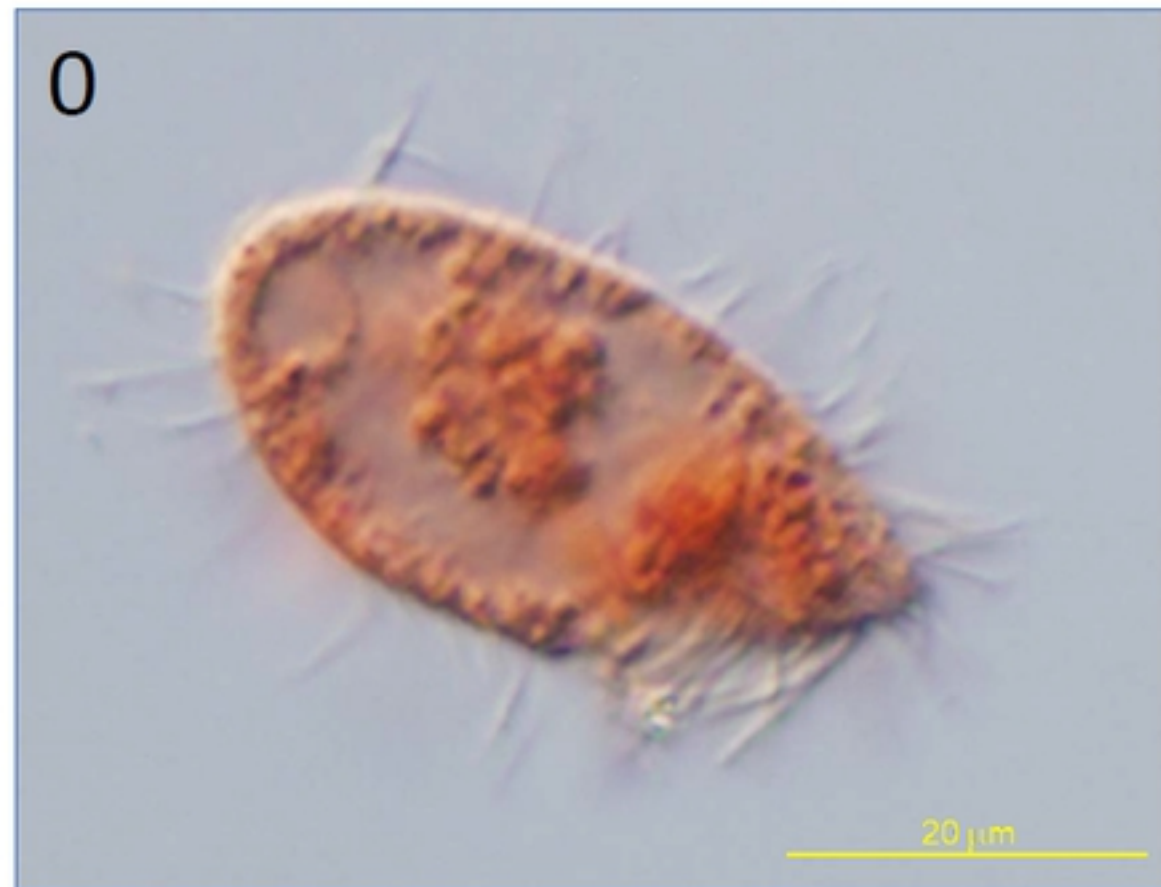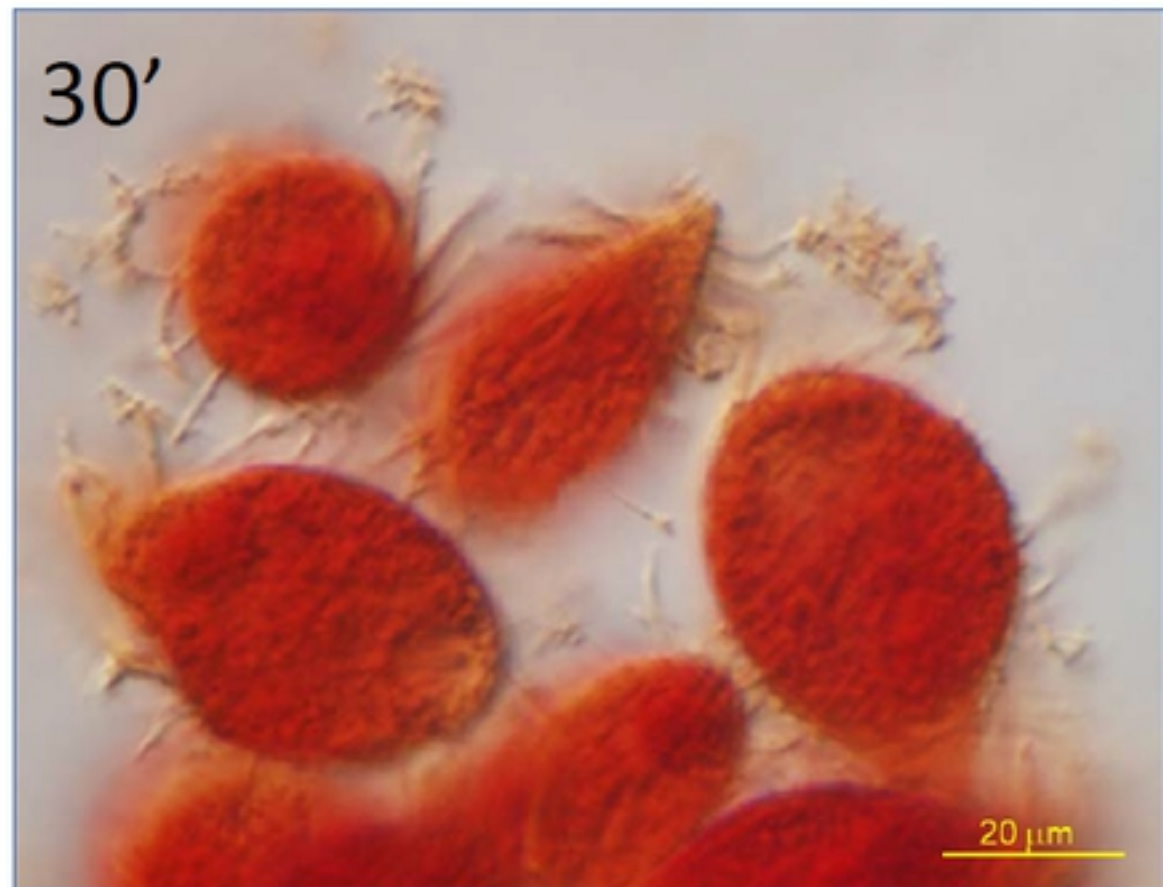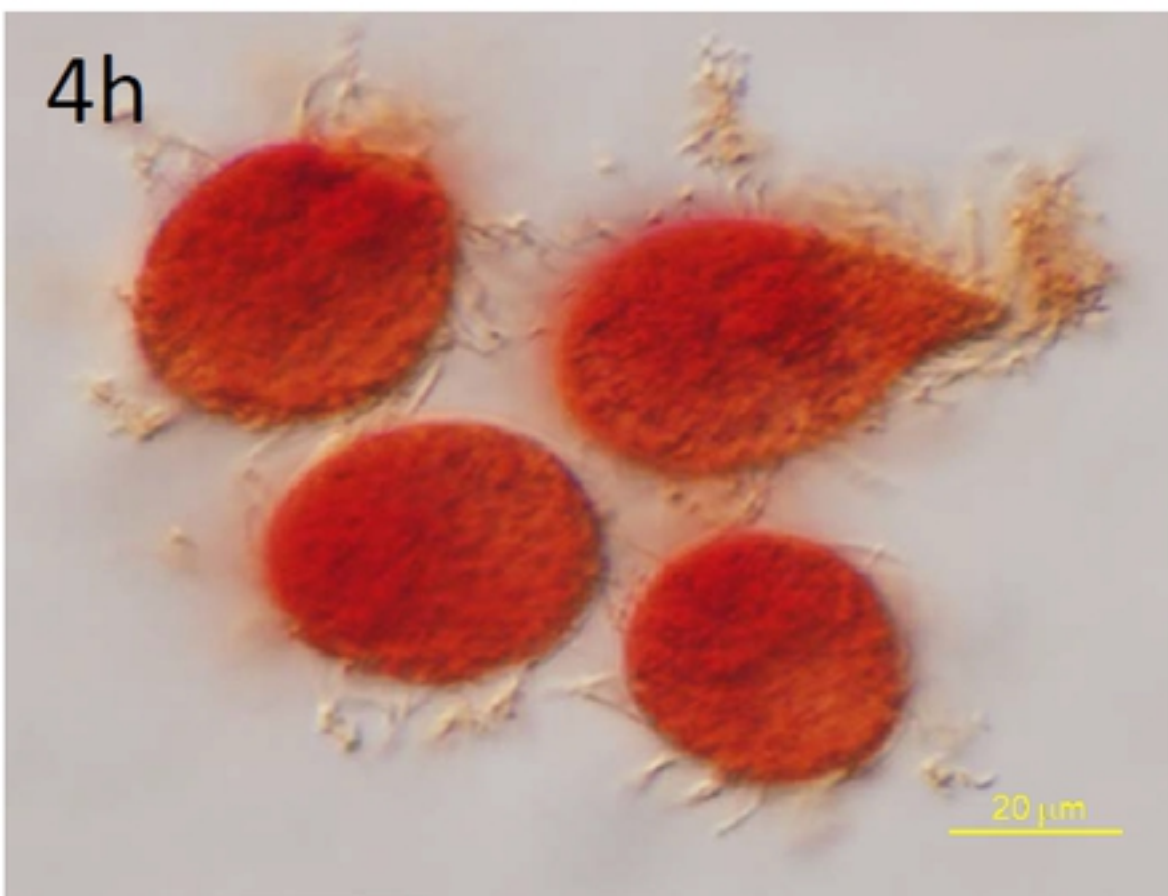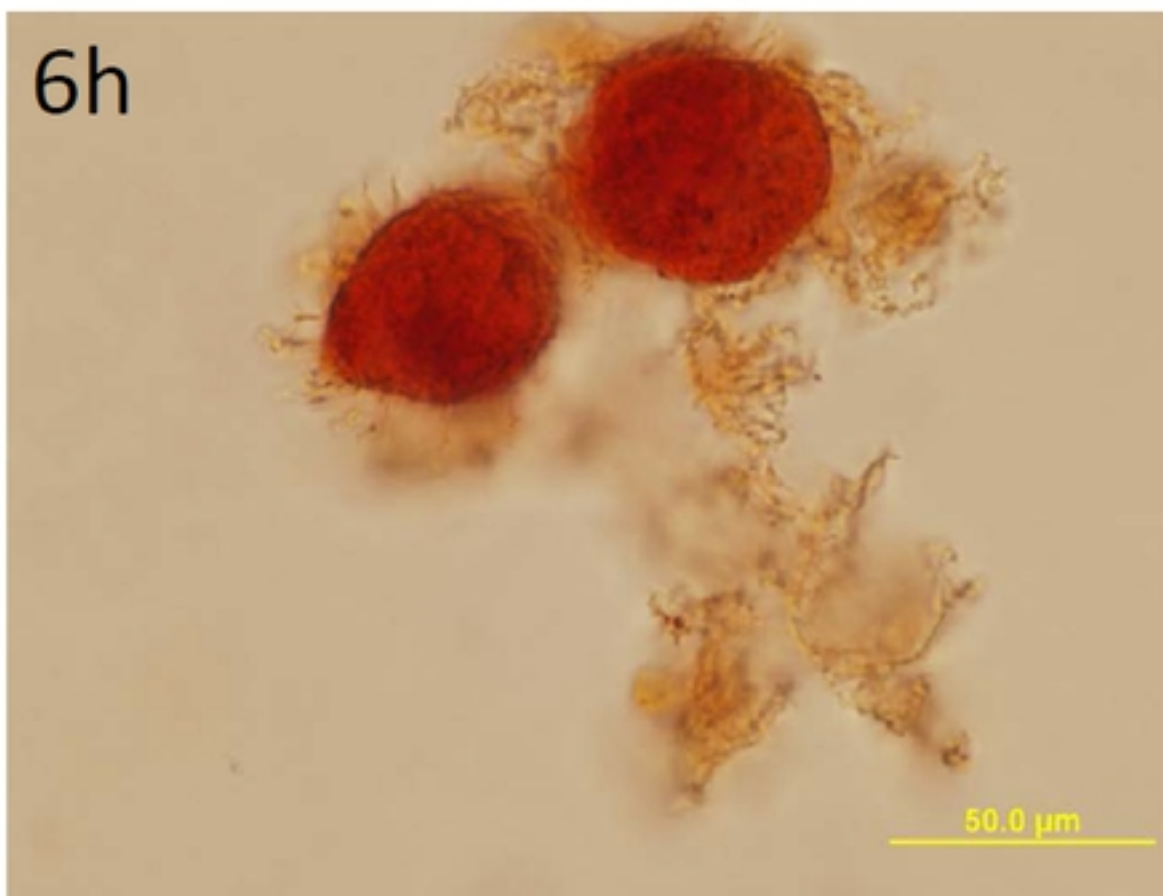

Figure 7

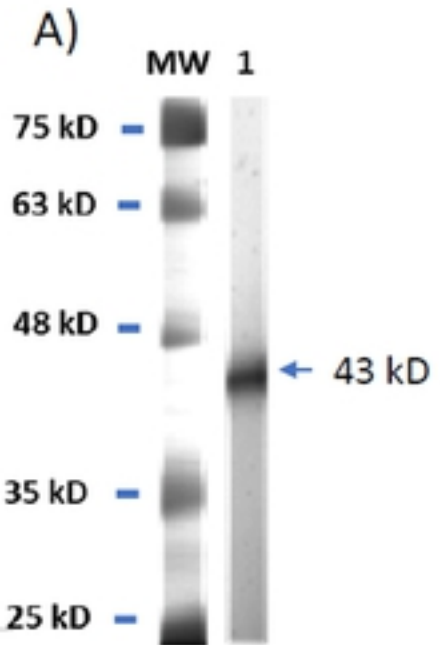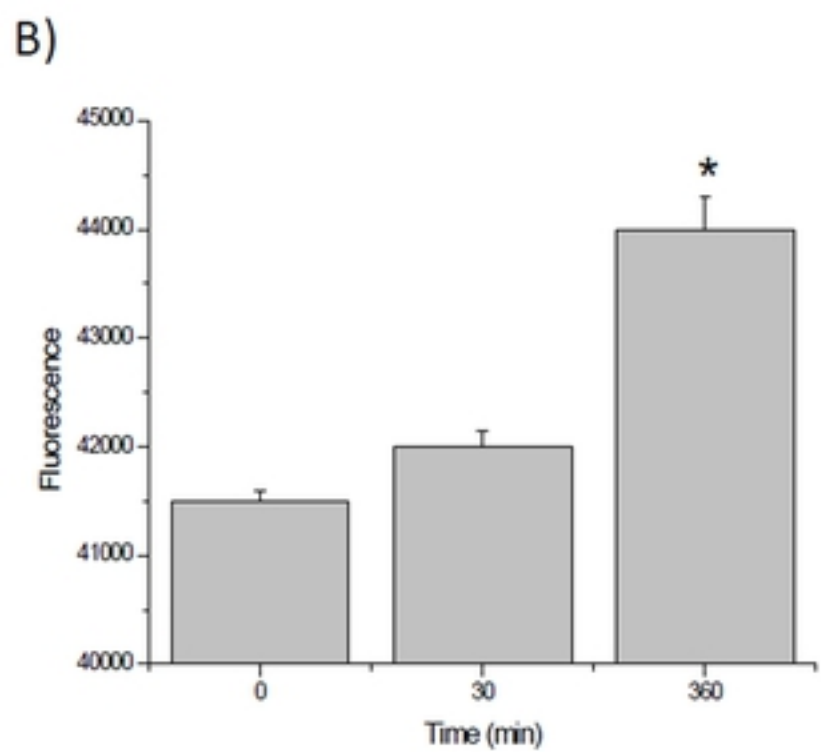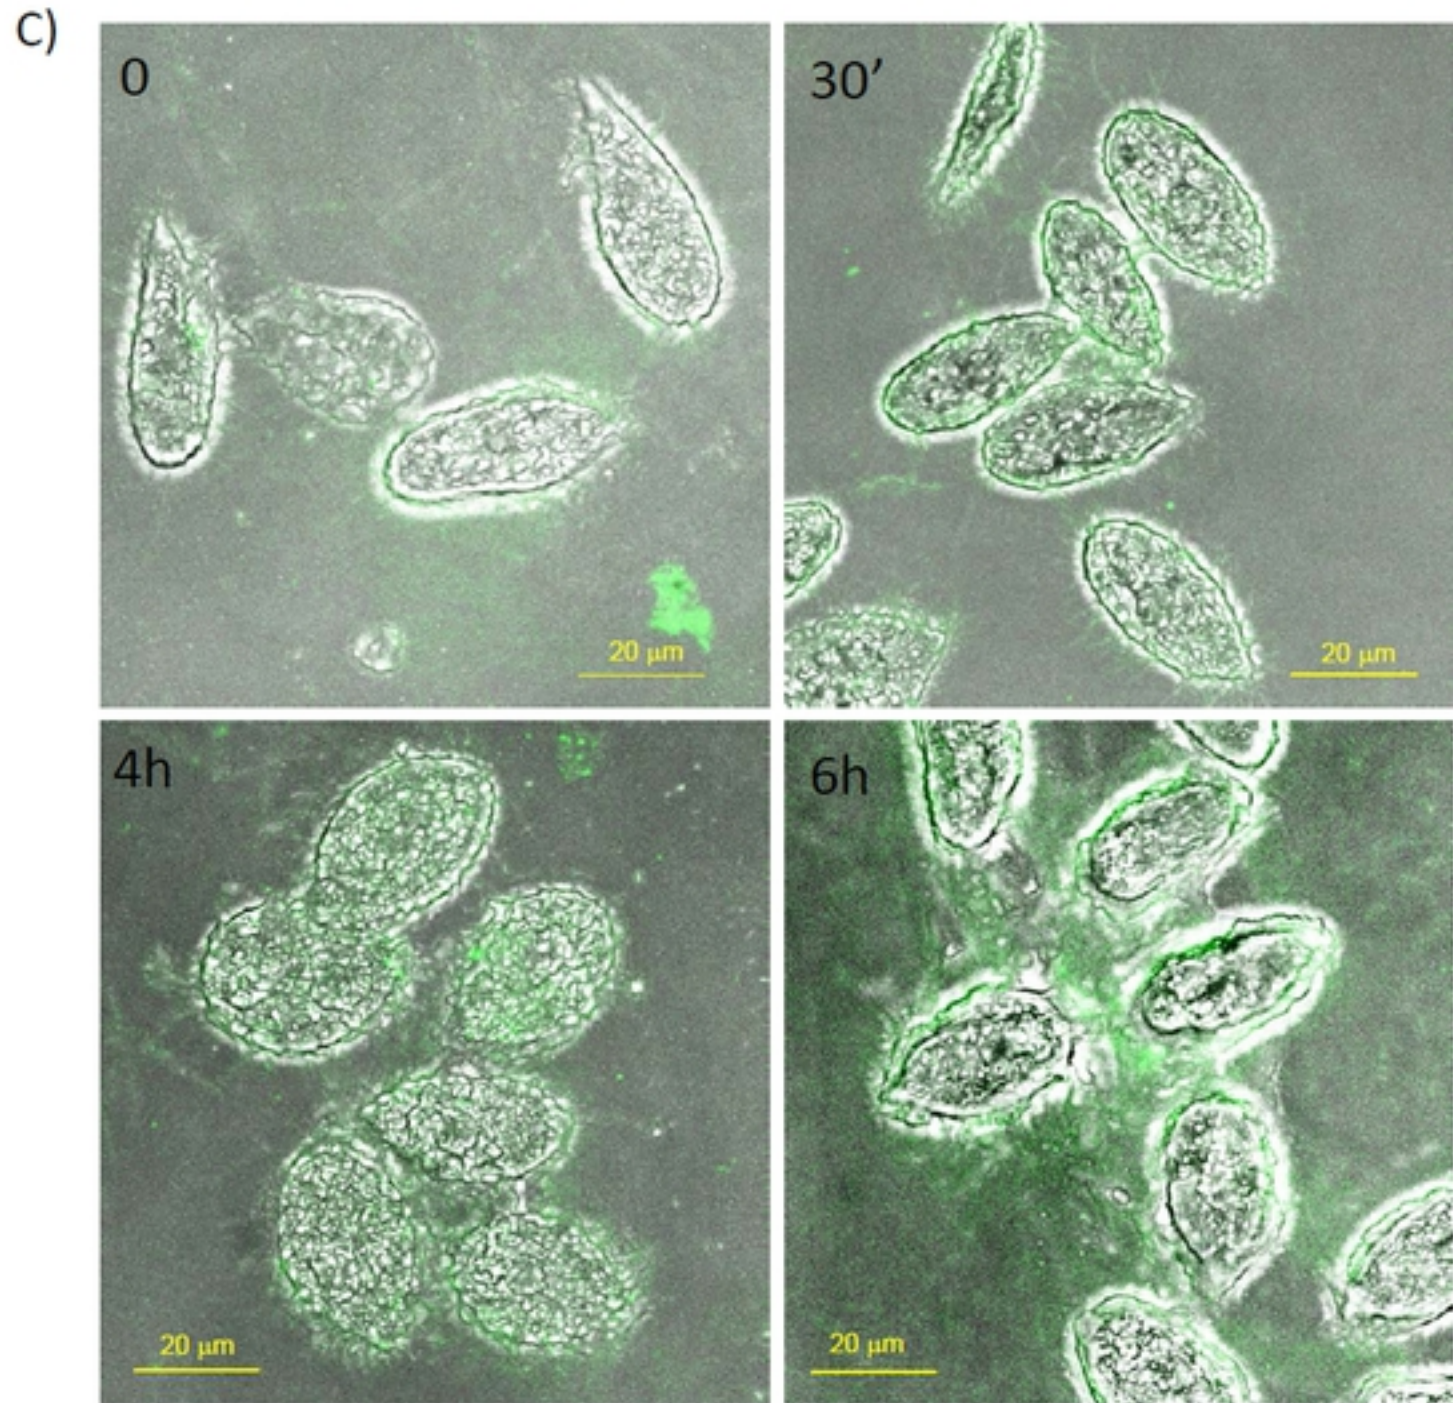

Figure 8

Figure 9
